# Supplementary material for: Co-catalysis of rhodium/phosphoramidite catalyst and ZSM-35(10) for the tandem hydroformylation–acetalization of olefins
Source: Royal Society of Chemistry journal article supplement (doi:10.1039/d3cc00488k), 2023-01-01
Supplement: d3cc00488k1.pdf [file d3cc00488k1.pdf]

## Supporting Information for

# Co-Catalysis of Rhodium–Phosphoramidite Catalyst and ZSM-35(10) for Tandem Hydroformylation–Acetalization of Olefins

Zhe Shu,<sup>†</sup> Xiu-Xiu Zhao,<sup>†</sup> Zhaohui Zheng,<sup>†</sup> Xueqing Zhang,<sup>†</sup> Yushuang Zhang,<sup>†</sup>

Shuhui Sun,<sup>†</sup> Jianbin Chen,<sup>‡</sup> Congxia Xie,<sup>†</sup> Bing Yuan<sup>\*·†</sup> and Xiaofei Jia<sup>\*·†</sup>

<sup>†</sup>Key Laboratory of Optic-electric Sensing and Analytical Chemistry for Life Science, MOE, College of Chemistry and Molecular Engineering, Qingdao University of Science and Technology, Qingdao 266042, P. R. China.

<sup>‡</sup>Shandong Provincial Key Laboratory of Molecular Engineering, School of Chemistry and Chemical Engineering, Qilu University of Technology (Shandong Academy of Sciences), Jinan 250353, P. R. China.

|                                                                                                                 |           |
|-----------------------------------------------------------------------------------------------------------------|-----------|
| <b>1. General methods .....</b>                                                                                 | <b>2</b>  |
| <b>2. Screening the conditions for catalytic hydroformylation-acetalization of 1-hexene. ....</b>               | <b>2</b>  |
| <b>3. N<sub>2</sub> sorption isotherm and pore size distribution of zeolites.....</b>                           | <b>3</b>  |
| <b>4. General procedure for tandem hydroformylation–acetalization of olefins.....</b>                           | <b>9</b>  |
| <b>5. Comparison of catalytic performance of catalysts reported in literature and in this study.</b>            | <b>9</b>  |
| <b>6. Preparation and characterization of Rh-H complexes .....</b>                                              | <b>10</b> |
| <b>7. Characterization data for the products .....</b>                                                          | <b>11</b> |
| <b>8. Recycling tests of the ZSM-35(10) in tandem hydroformylation-acetalization of 1-hexene with EtOH.....</b> | <b>14</b> |
| <b>9. NMR spectra of major products.....</b>                                                                    | <b>16</b> |
| <b>10. GC data for Table 1 .....</b>                                                                            | <b>24</b> |
| <b>11. Standard orientation, imaginary frequencies of all stationary points .....</b>                           | <b>32</b> |
| <b>References:.....</b>                                                                                         | <b>37</b> |

## 1. General methods

Unless otherwise noted, all manipulations involving air or moisture-sensitive compounds were performed in a nitrogen-filled glovebox or using standard Schlenk techniques. Solvents were dried according to standard procedures.  $^1\text{H}$  NMR spectra were recorded on 400 MHz or 600 MHz and  $^{13}\text{C}$  NMR spectra were recorded on 101 MHz by using a Bruker Avance 400 spectrometer. Chemical shifts ( $\delta$  values) were reported in ppm with internal TMS ( $^1\text{H}$  NMR),  $\text{CDCl}_3$  ( $^{13}\text{C}$  NMR), or external 85%  $\text{H}_3\text{PO}_4$  ( $^{31}\text{P}$  NMR) as the standard, respectively. The IR spectra were measured on a Thermo (SCIENTIFIC) NICOLET iS10 spectrometer.  $\text{N}_2$  sorption isotherm was obtained on a Micromeritics ASAP 2460. HRMS (ESI) were determined on Agilent 1290-6545XT. GC analyses were measured on an Agilent 7820A system using an FID detector.

## 2. Screening the conditions for catalytic hydroformylation-acetalization of 1-hexene.

**Table S1.** Selected results of screening the conditions for catalytic hydroformylation-acetalization of 1-hexene<sup>a</sup>

| Entry | Rh/L | ZSM-35(10).<br>(mg) | $\text{H}_2/\text{CO}$<br>(bar) | Temp.<br>( $^\circ\text{C}$ ) | Solv.<br>(mL) | Conv.<br>(%) | <i>l/b</i> <sup>b</sup> | <b>1a</b> <sup>c</sup><br>(%) | <b>1b</b> <sup>d</sup><br>(%) | <b>1c</b> <sup>e</sup><br>(%) | <b>1d</b> <sup>e</sup><br>(%) |
|-------|------|---------------------|---------------------------------|-------------------------------|---------------|--------------|-------------------------|-------------------------------|-------------------------------|-------------------------------|-------------------------------|
| 1     | 1:1  | 40                  | 20/20                           | 120                           | 5.0           | 99.21        | 19.83                   | 94.76                         | 2.99                          | 1.18                          | 0.29                          |
| 2     | 1:3  | 40                  | 20/20                           | 120                           | 5.0           | 99.65        | 22.23                   | 85.72                         | 12.49                         | 1.05                          | 0.38                          |
| 3     | 1:5  | 40                  | 20/20                           | 120                           | 5.0           | 99.65        | 77.10                   | 97.35                         | 1.56                          | 0.43                          | 0.31                          |
| 4     | 1:7  | 40                  | 20/20                           | 120                           | 5.0           | 99.11        | 78.20                   | 91.11                         | 6.33                          | 1.51                          | 0.15                          |
| 5     | 1:5  | 20                  | 20/20                           | 120                           | 5.0           | 98.48        | 12.85                   | 77.89                         | 17.12                         | 2.09                          | 1.38                          |
| 6     | 1:5  | 60                  | 20/20                           | 120                           | 5.0           | 99.55        | 43.63                   | 96.36                         | 2.10                          | 0.42                          | 0.67                          |
| 7     | 1:5  | 40                  | 20/20                           | 110                           | 5.0           | 99.51        | 32.12                   | 95.77                         | 2.90                          | 0.39                          | 0.44                          |
| 8     | 1:5  | 40                  | 20/20                           | 100                           | 5.0           | 99.63        | 29.51                   | 93.43                         | 4.43                          | 0.87                          | 0.91                          |
| 9     | 1:5  | 40                  | 20/20                           | 90                            | 5.0           | 99.20        | 35.14                   | 86.68                         | 5.56                          | 3.76                          | 0.74                          |
| 10    | 1:5  | 40                  | 10/10                           | 120                           | 5.0           | 98.74        | 26.43                   | 77.30                         | 13.49                         | 1.39                          | 6.55                          |
| 11    | 1:5  | 40                  | 25/25                           | 120                           | 5.0           | 99.64        | 63.10                   | 90.64                         | 7.25                          | 1.08                          | 0.68                          |
| 12    | 1:5  | 40                  | 20/20                           | 120                           | 2.5           | 99.60        | 50.45                   | 70.80                         | 27.16                         | 0.91                          | 0.73                          |
| 13    | 1:5  | 40                  | 20/20                           | 120                           | 7.5           | 99.45        | 75.50                   | 95.10                         | 2.54                          | 0.95                          | 0.86                          |

<sup>a</sup>1-Hexene (3.8 mmol),  $\text{Rh}(\text{acac})(\text{CO})_2$  ( $3.8 \times 10^{-4}$  mmol),  $\text{S}/\text{C}_{\text{Rh}}$  (ratio of substrate to catalyst rhodium) = 10000, EtOH (5.0 mL), 24 h, decane as the internal standard. <sup>b</sup>Linear/branched acetal ratio, determined by GC analysis. <sup>c</sup>Yield of all acetals. <sup>d</sup>Yield of all aldehydes.

<sup>e</sup>Yield of hydrogenation product. <sup>f</sup>Yield of isomerization product.

**Table S2.** Selected results of screening the optimal conditions for catalytic hydroformylation-acetalization of 1-hexene<sup>a</sup>

| Entry | Ligand     | zeolites    | conv. (%) | <b>1a</b> <sup>b</sup> (%) | <i>l/b</i> <sup>c</sup> | <b>1b</b> <sup>d</sup> (%) | <b>1c</b> (%) | <b>1d</b> (%) | TON <sup>e</sup> |
|-------|------------|-------------|-----------|----------------------------|-------------------------|----------------------------|---------------|---------------|------------------|
| 1     | <b>L1</b>  | ZSM-35(10)  | 98.4      | 81.2                       | 2.7                     | 15.4                       | 0.7           | 1.0           | 9660             |
| 2     | <b>L2</b>  | ZSM-35(10)  | 98.7      | 77.3                       | 0.9                     | 18.9                       | -             | 2.4           | 9620             |
| 3     | <b>L3</b>  | ZSM-35(10)  | 98.3      | 80.0                       | 2.7                     | 17.3                       | -             | 1.0           | 9730             |
| 4     | <b>L4</b>  | ZSM-35(10)  | 98.4      | 69.9                       | 2.5                     | 25.4                       | 1.90          | 1.2           | 9530             |
| 5     | <b>L5</b>  | ZSM-35(10)  | 75.8      | 60.5                       | 4.2                     | 9.6                        | 2.57          | 3.1           | 7010             |
| 6     | <b>L6</b>  | ZSM-35(10)  | 97.2      | 61.3                       | 2.3                     | 12.8                       | 5.08          | 18.1          | 7410             |
| 7     | <b>L7</b>  | ZSM-35(10)  | 98.4      | 82.5                       | 1.2                     | 15.9                       | -             | -             | 9840             |
| 8     | <b>L8</b>  | ZSM-35(10)  | 99.0      | 89.6                       | 66.5                    | 7.3                        | -             | 4.1           | 9690             |
| 9     | <b>L9</b>  | ZSM-35(10)  | 99.0      | 76.1                       | 2.5                     | 22.9                       | -             | -             | 9900             |
| 10    | <b>L10</b> | ZSM-35(10)  | 99.1      | 91.6                       | 25.2                    | 5.5                        | 0             | 1.7           | 9710             |
| 11    | <b>L11</b> | ZSM-35(10)  | 99.9      | 97.7                       | 77.1                    | 2.3                        | -             | -             | 10000            |
| 12    | <b>L11</b> | MCM-41      | 99.5      | 78.9                       | 1.2                     | 19.3                       | 0.24          | 1.1           | 9820             |
| 13    | <b>L11</b> | ZSM-5       | 99.3      | 85.9                       | 8.0                     | 12.3                       | 0.29          | 0.8           | 9820             |
| 14    | <b>L11</b> | β-Zeolite   | 98.9      | 85.4                       | 23.8                    | 9.1                        | 1.0           | 3.4           | 9450             |
| 15    | <b>L11</b> | ZSM-35(100) | 99.4      | 82.1                       | 20.2                    | 16.2                       | 0             | 1.1           | 9830             |

**L1:** R = H;  
**L2:** R = *o*-CH<sub>3</sub>;  
**L3:** R = *p*-OCH<sub>3</sub>;

**L4:** n = 1;  
**L5:** n = 3;

**L6:** BINAP

**L7:** R = *t*Bu;  
**L8 (Xantphos):** R = Ph;

**L9:** Biphephos

**L10:** BPpa

**L11:** BINAPa

<sup>a</sup>1-Hexene (3.8 mmol), Rh(acac)(CO)<sub>2</sub> (3.8×10<sup>-4</sup> mmol), ligand (1.9×10<sup>-3</sup> mmol), S/C<sub>Rh</sub> (ratio of substrate to catalyst rhodium) = 10000, zeolites (40 mg), H<sub>2</sub>/CO (20/20 bar), EtOH (5.0 mL), 120 °C, 24 h, decane as the internal standard, yields were determined by GC analysis.  
<sup>b</sup>Yield of all acetals. <sup>c</sup>Linear/branched acetal ratio. <sup>d</sup>Yield of all aldehydes. <sup>e</sup>Turnover Number of the Rh with respect to the yield of oxo products.

### 3. N<sub>2</sub> sorption isotherm and pore size distribution of zeolites.

**Table S3.** Textural parameters of zeolites<sup>a</sup>

| Entry | zeolites    | surface area (m <sup>2</sup> /g) | pore volume (cm <sup>3</sup> /g) | pore size (nm)       |
|-------|-------------|----------------------------------|----------------------------------|----------------------|
| 1     | MCM-41      | 1,062.94                         | 0.94                             | 1.19-1.88; 2.98-4.05 |
| 2     | β-Zeolite   | 454.85                           | 0.34                             | 0.53-0.84            |
| 3     | ZSM-5       | 262.78                           | 0.15                             | 0.65-0.79; 1.09-2.51 |
| 4     | ZSM-35(10)  | 277.98                           | 0.16                             | 0.65-0.73            |
| 5     | ZSM-35(100) | 329.59                           | 0.19                             | 0.65-0.85            |

<sup>a</sup>Analysed by BET (Brunauer-Emmett-Teller) method.

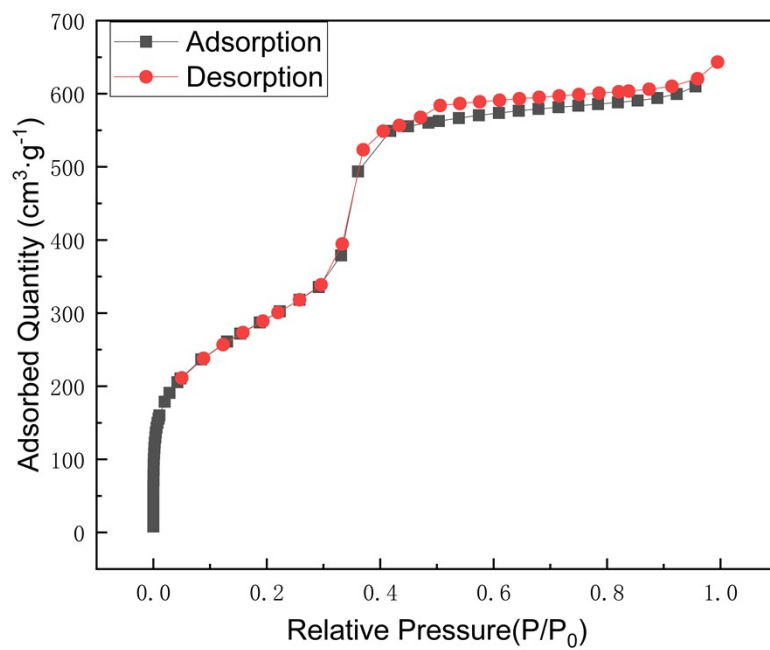

Figure S1.  $N_2$  sorption isotherm of MCM-41

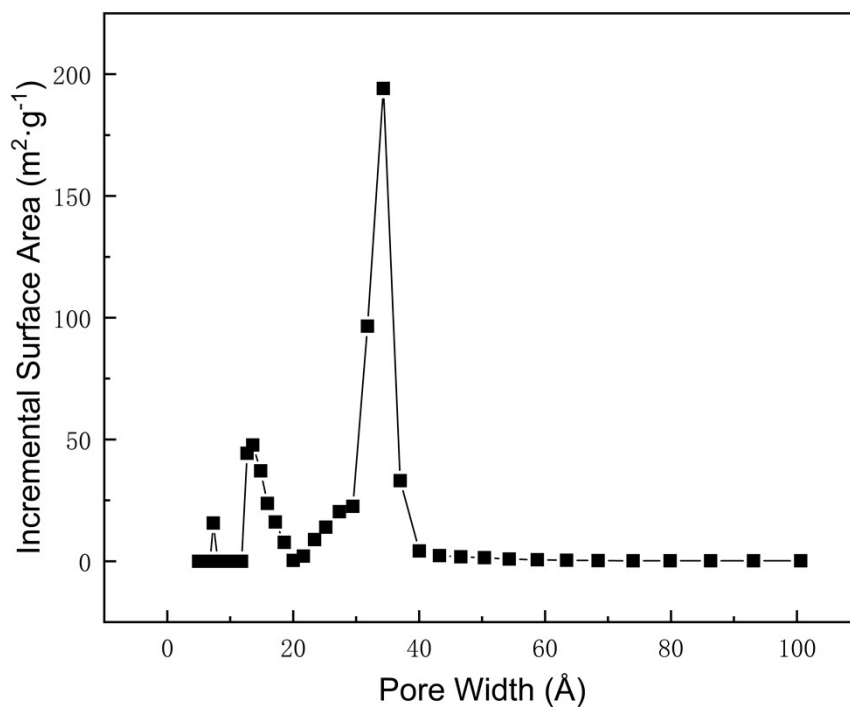

Figure S2. pore size distribution MCM-41

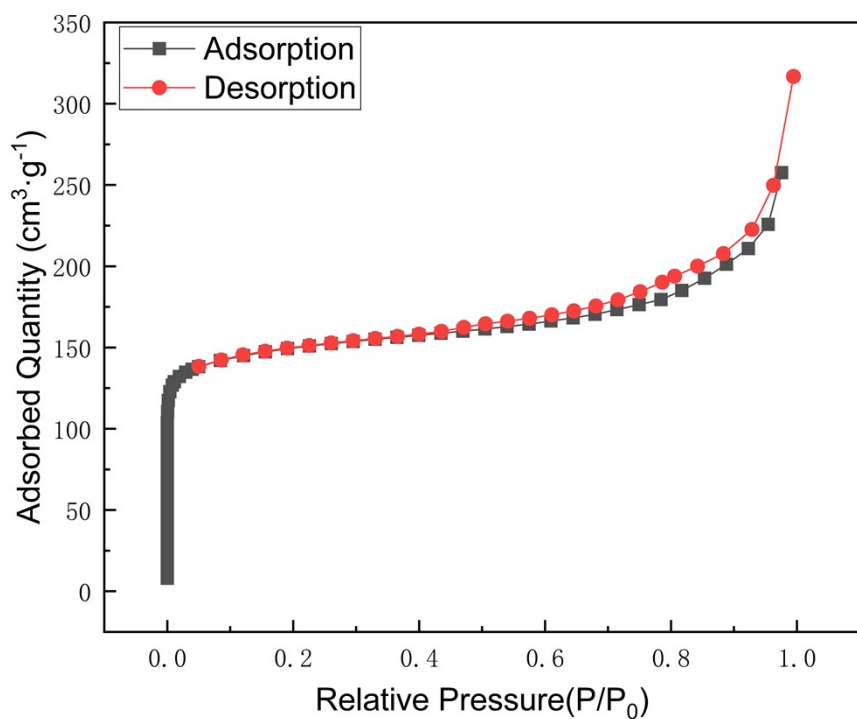

Figure S3.  $\text{N}_2$  sorption isotherm of  $\beta$ -Zeolite

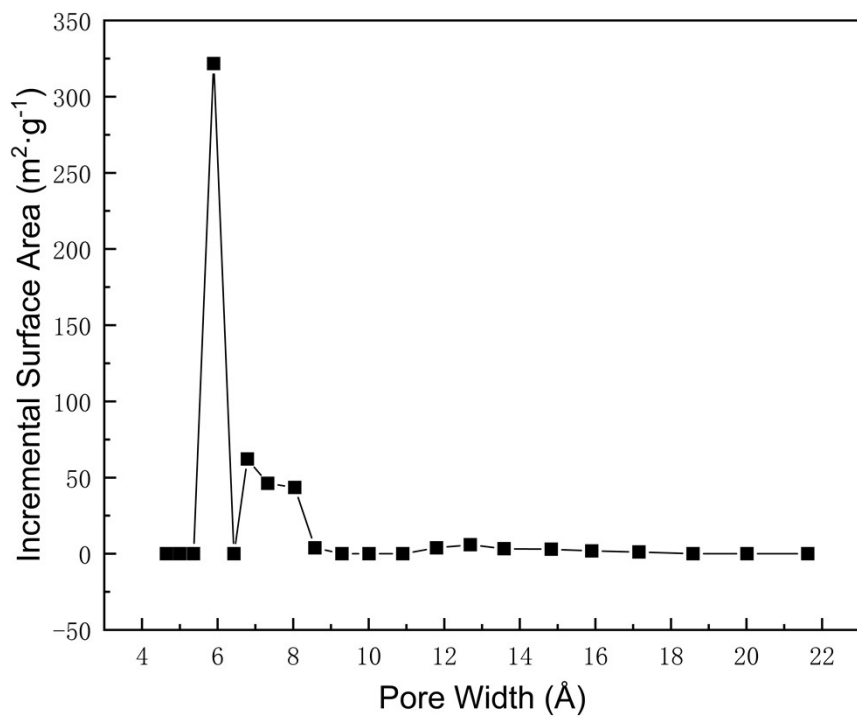

Figure S4. pore size distribution of  $\beta$ -Zeolite

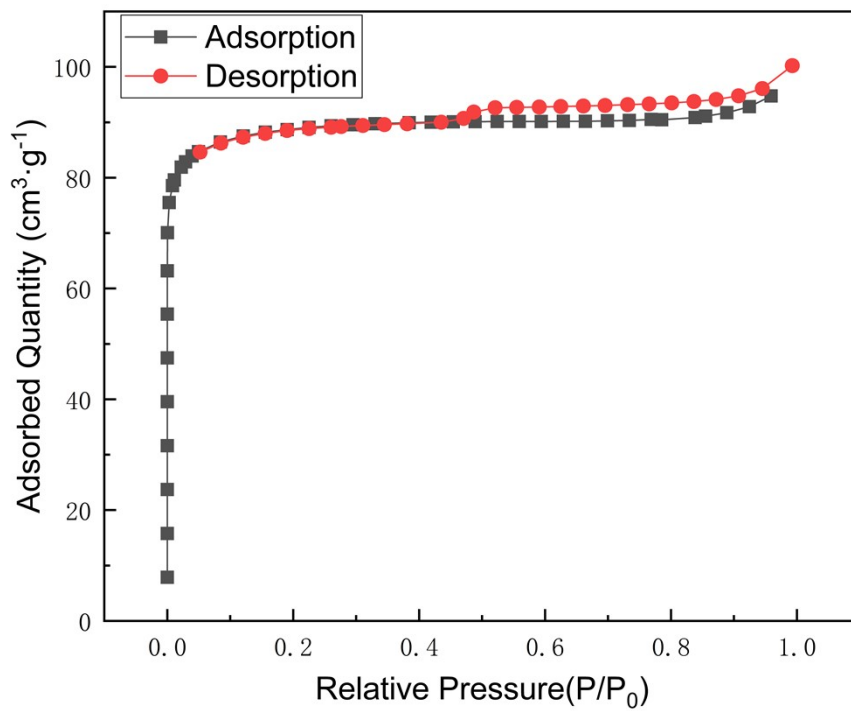

Figure S5.  $\text{N}_2$  sorption isotherm of ZSM-5

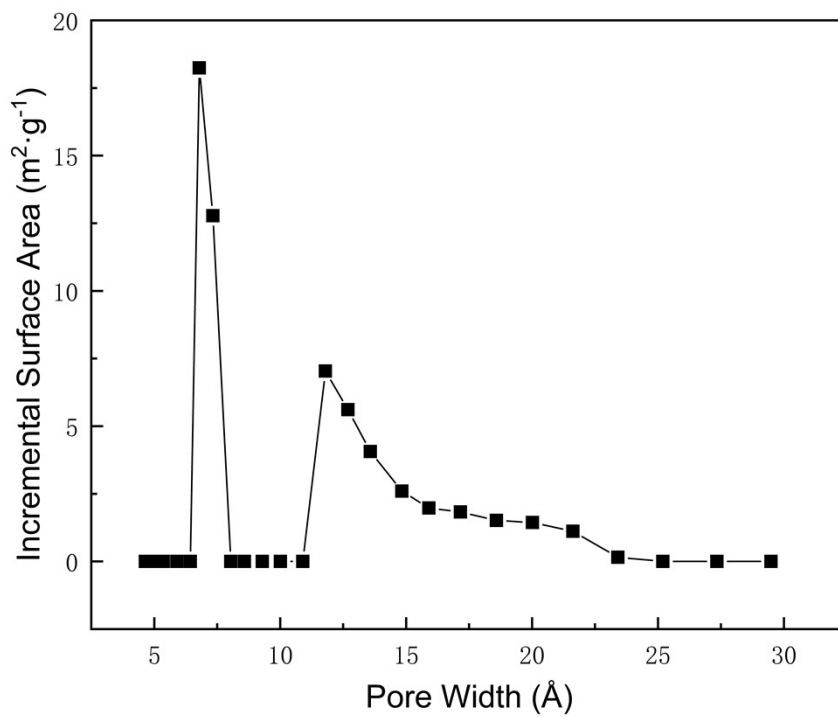

Figure S6. pore size distribution of ZSM-5

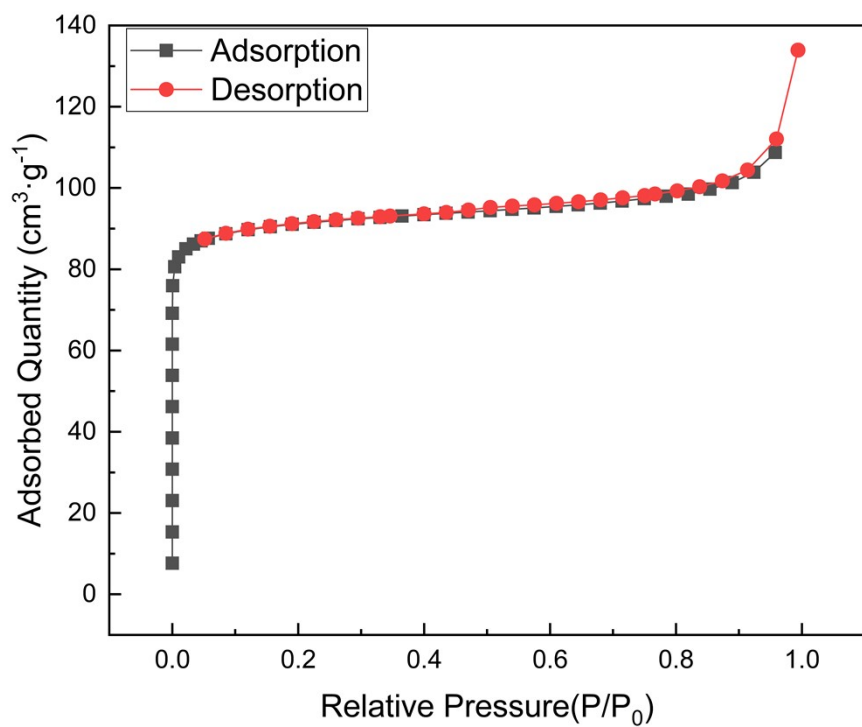

Figure S7.  $\text{N}_2$  sorption isotherm of ZSM-35(10)

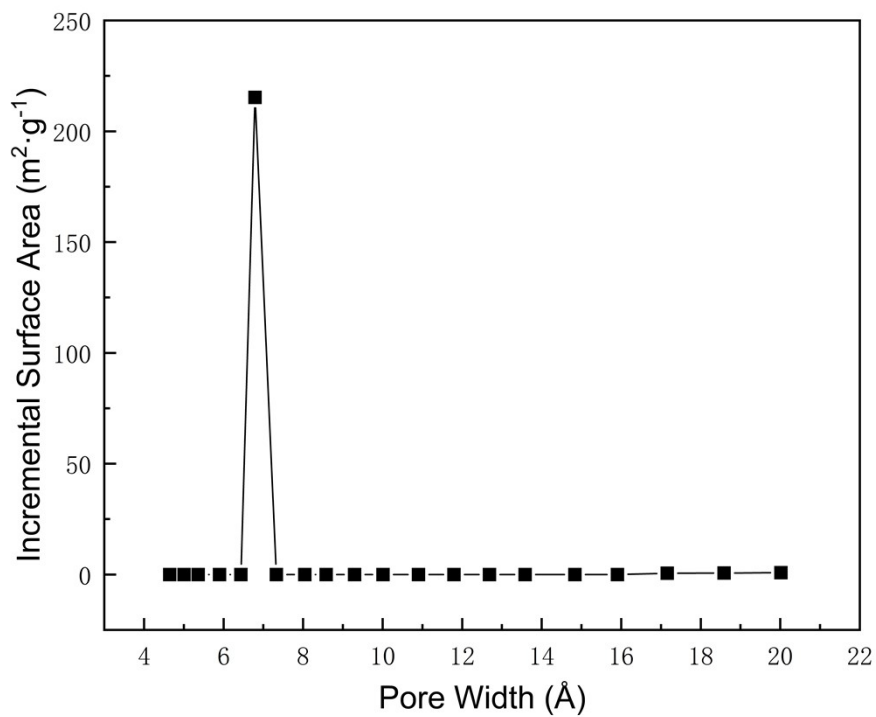

Figure S8. pore size distribution of ZSM-35(10)

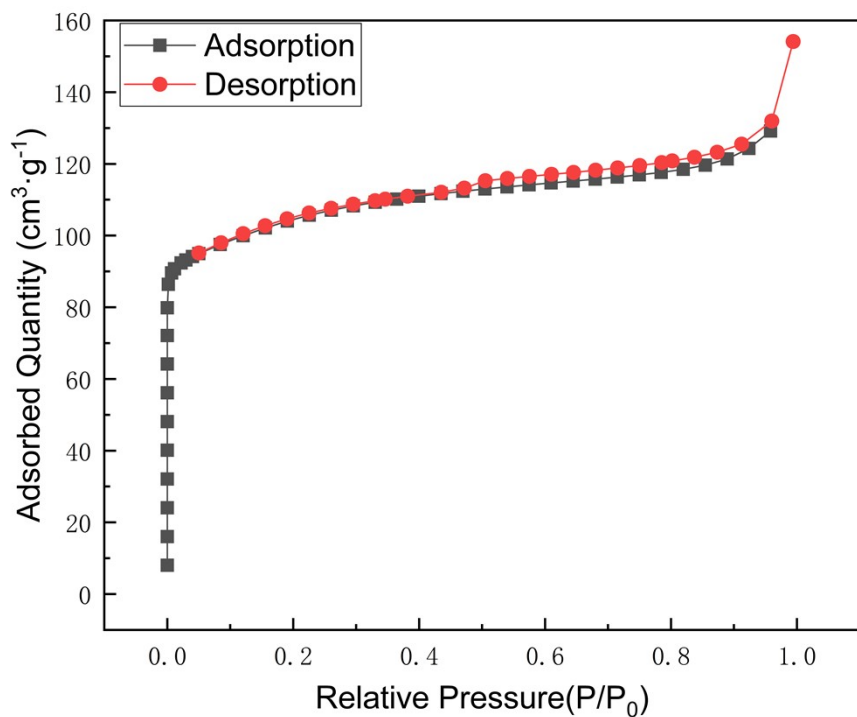

Figure S9.  $N_2$  sorption isotherm of ZSM-35(100)

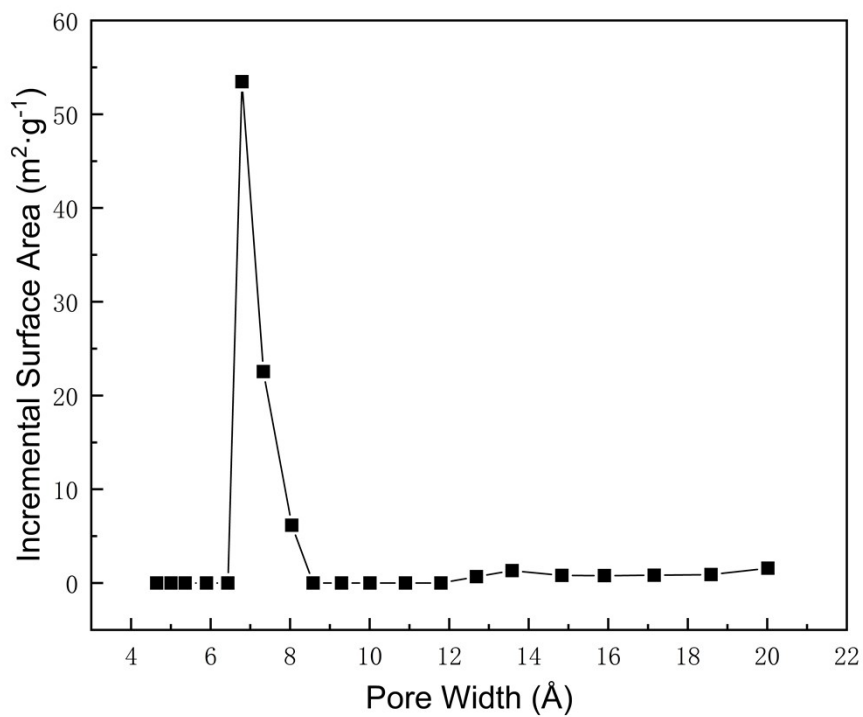

Figure S10. pore size distribution of ZSM-35(100)



## 4. General procedure for tandem hydroformylation–acetalization of olefins.

In a glove box, an autoclave with a magnetic stirring bar was charged with EtOH (5.0 mL), ZSM-35(10) (40 mg), Rh(acac)(CO)<sub>2</sub> (0.1 mg, 3.8 × 10<sup>-4</sup> mmol), BINAPa (1.16 mg, 1.9 × 10<sup>-3</sup> mmol), 1-hexene (0.47 mL, 3.8 mmol) and decane (16 μL) as the internal standard. The mixture was purged with hydrogen for three times and subsequently charged with CO (20 bar) and H<sub>2</sub> (20 bar). The autoclave was then heated to 120 °C (oil bath) and was kept at this temperature for 24 h. The autoclave was cooled in ice water, and the gas was carefully released in a well-ventilated hood. The mixture subsequently was analyzed by gas chromatography (GC).

GC analysis condition: SE-54, 30 m × 0.32 mm × 0.33 mm, flow rate 2.0 mL min<sup>-1</sup>, method: 50 °C was maintained for 5 min, and then ramped from 50 °C to 120 °C at a rate of 10 °C min<sup>-1</sup>, 120 °C was maintained for 2 min; then ramped from 120 °C to 250 °C at a rate of 20 °C min<sup>-1</sup>, 250 °C was maintained for 10 min.

## 5. Comparison of catalytic performance of catalysts reported in literature and in this study

Table S4. Comparison of catalytic performance of catalysts reported in literature and in this study

| catalyst                                                             | yield     | //b      | TON <sub>oxo</sub> <sup>a</sup> |
|----------------------------------------------------------------------|-----------|----------|---------------------------------|
| Rh/BINAPa, ZSM-35(10)                                                | 50.6-98.4 | ≥30.5    | 43000                           |
| Rh(acac)(CO) <sub>2</sub> /L12 <sup>12b</sup>                        | 84.3-92.1 | 1.1-1.9  | 1900                            |
| Rh(acac)(CO) <sub>2</sub> /L13 <sup>12a</sup>                        | 39.2-94.1 | 0.4-2.1  | 980                             |
| Rh/P complex <sup>7c</sup>                                           | 81.0-99.0 | 0.9-1.6  | 2475                            |
| RhCl <sub>3</sub> •3H <sub>2</sub> O/PPh <sub>3</sub> <sup>11a</sup> | 96.9      | 3.0      | 980                             |
| [Rh(cod) <sub>2</sub> ]BF <sub>4</sub> /Xantphos <sup>11b</sup>      | 5.8-86.2  | 9.1-89.2 | 184                             |

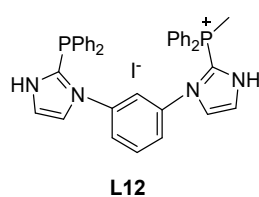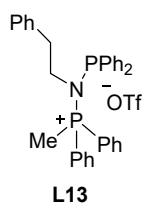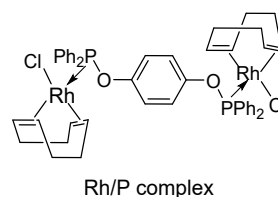

## 6. Preparation and characterization of Rh-H complexes

In a glovebox, the mixture of Rh(acac)(CO)<sub>2</sub> (4.1 mg, 0.016 mmol), BINAPa (9.8 mg, 0.016 mmol), ZSM-35(10) (10 mg), in toluene-d<sub>8</sub> (2.0 mL) was stirred for 0.5 hour at room temperature in a 10 mL glass vial, which was then transferred into a stainless-steel autoclave and sealed. The autoclave was purged with H<sub>2</sub> three times and subsequently charged with CO (10 bar) and H<sub>2</sub> (10 bar). The autoclave was then heated to 40 °C (oil bath) and stirred at the temperature for 10 h. After cooling the autoclave to 0 °C, the syngas was carefully released, and the solution was submitted to NMR analysis.

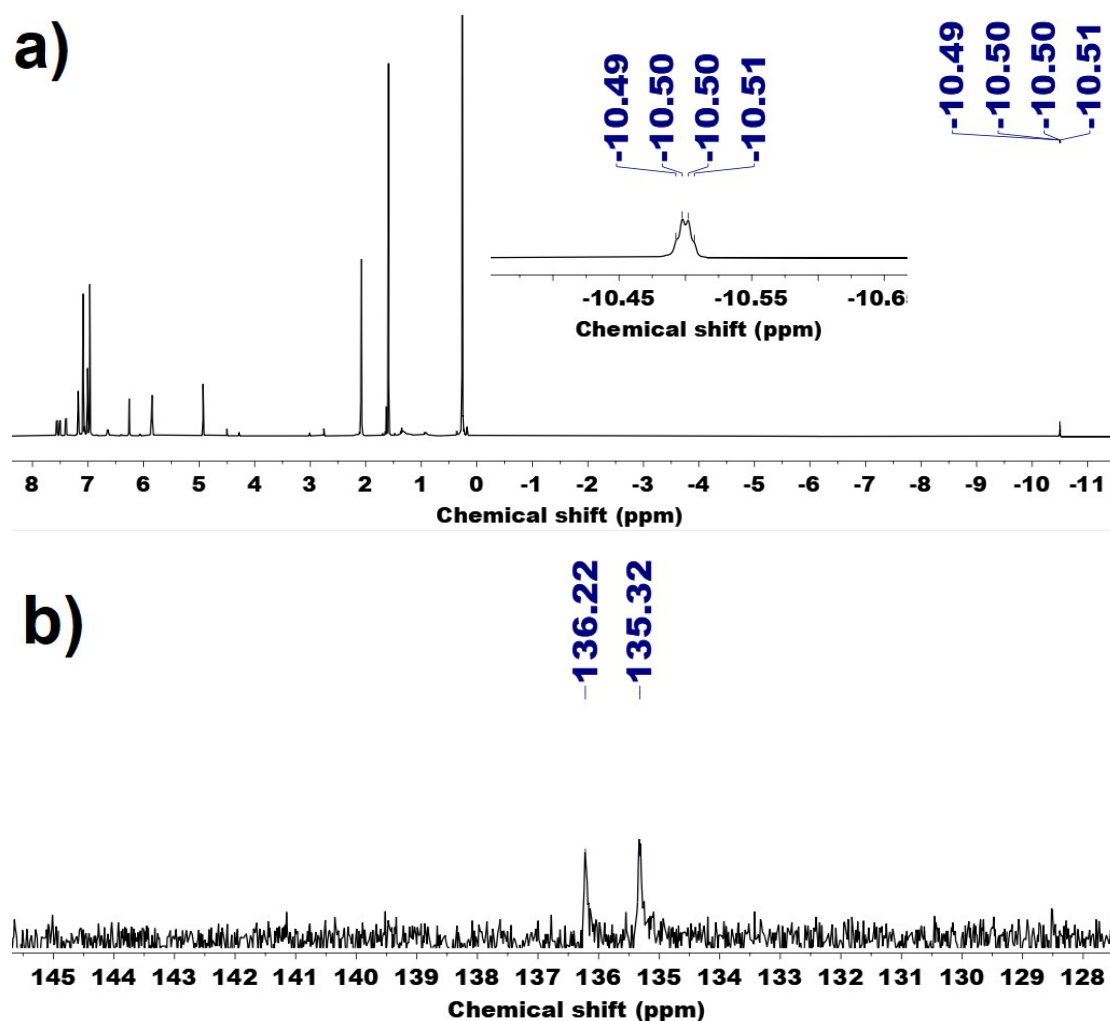

Figure S11. (a) <sup>1</sup>H NMR spectra, (b) <sup>31</sup>P NMR spectra of [HRh(CO)(BINAPa)] in the presence of

ZSM-35(10).

## 7. Characterization data for the products

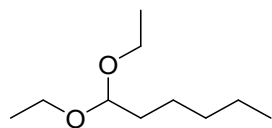

**1,1-Diethoxyhexane (2a)**<sup>[1]</sup>: colorless oil, 608.20 mg, 91.9% yield. **<sup>1</sup>H NMR** (400 MHz, CDCl<sub>3</sub>): δ 4.42 (t, *J* = 5.6 Hz, 1H), 3.62-3.54 (m, 2H), 3.47-3.40 (m, 2H), 1.56-1.52 (m, 2H), 1.25 (m, 6H), 1.30-1.15 (t, *J* = 7.2 Hz, 6H), 0.83-0.82 (m, 3H) ppm.

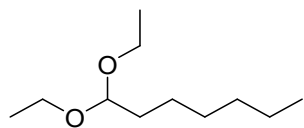

**1,1-Diethoxyheptane (1a)**<sup>[2]</sup>: colorless oil, 652.87 mg, 91.3% yield. **<sup>1</sup>H NMR** (400 MHz, CDCl<sub>3</sub>): δ 4.41 (t, *J* = 6.0 Hz, 1H), 3.61-3.53 (m, 2H), 3.46-3.39 (m, 2H), 1.55-1.51 (m, 2H), 1.25-1.22 (m, 8H), 1.13 (t, *J* = 7.2 Hz, 6H), 0.82-0.80 (m, 3H) ppm.

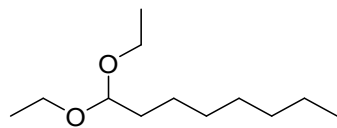

**1,1-Diethoxyoctane (3a)**<sup>[1]</sup>: pale yellow oil, 674.59 mg, 87.8% yield. **<sup>1</sup>H NMR** (400 MHz, CDCl<sub>3</sub>): δ 4.43 (t, *J* = 6.0 Hz, 1H), 3.64-3.55 (m, 2H), 3.48-3.40 (m, 2H), 1.58-1.53 (m, 2H), 1.30-1.23 (m, 10H), 1.15 (t, *J* = 7.2 Hz, 6H), 0.83 (t, *J* = 6.8 Hz, 3H) ppm.

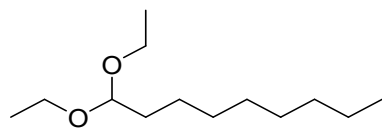

**1,1-Diethoxynonane (4a)**: pale yellow oil, 715.61 mg, 87.1% yield. **<sup>1</sup>H NMR** (400 MHz, CDCl<sub>3</sub>): δ 4.45 (t, *J* = 5.6 Hz, 1H), 3.65-3.58 (m, 2H), 3.50-3.43 (m, 2H), 1.59-1.56 (m, 2H), 1.32-1.25 (m, 12H), 1.18 (t, *J* = 7.2 Hz, 6H), 0.86 (t, *J* = 6.8 Hz, 3H) ppm; **<sup>13</sup>C NMR** (101 MHz, CDCl<sub>3</sub>): δ 103.0, 60.8, 33.6, 31.9, 29.5, 29.5, 29.2, 24.8, 22.6, 15.3, 14.1 ppm; **FT-IR**  $\nu$  max/cm<sup>-1</sup> 2926.06, 2856.61,

1461.89, 1376.18, 1119.20, 1059.82, 905.84, 731.13, 648.80; HRMS (ESI)  $m/z$ : Calcd. For  $C_{13}H_{28}NaO_2^+$ : 239.1982, Found: 239.1986 ( $M+Na^+$ ).

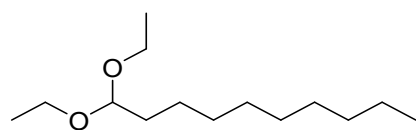

**1,1-Diethoxydecane (5a)**<sup>[3]</sup>: pale yellow oil, 755.86 mg, 86.4% yield.  **$^1H$  NMR** (400 MHz,  $CDCl_3$ ):  $\delta$  4.41 (t,  $J = 5.6$  Hz, 1H), 3.61-3.53 (m, 2H), 3.46-3.38 (m, 2H), 1.54-1.51 (m, 2H), 1.30-1.20 (m, 14H), 1.13 (t,  $J = 7.2$  Hz, 6H), 0.81 (t,  $J = 6.8$  Hz, 3H) ppm.

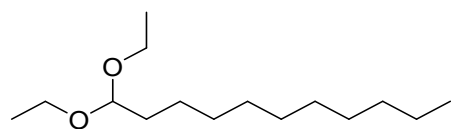

**1,1-Diethoxydecane (6a)**<sup>[2]</sup>: pale yellow oil, 748.99 mg, 80.7% yield.  **$^1H$  NMR** (400 MHz,  $CDCl_3$ ):  $\delta$  4.31 (t,  $J = 5.6$  Hz, 1H), 3.50-3.43 (m, 2H), 3.35-3.28 (m, 2H), 1.47-1.42 (m, 2H), 1.19-1.12 (m, 16H), 1.03 (t,  $J = 7.2$  Hz, 6H), 0.73 (t,  $J = 7.2$  Hz, 3H) ppm.

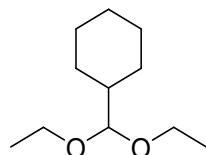

**(Diethoxymethyl)cyclohexane (7a)**<sup>[3]</sup>: pale yellow oil, 543.29 mg, 76.8% yield.  **$^1H$  NMR** (400 MHz,  $CDCl_3$ ):  $\delta$  4.08 (d,  $J = 7.2$  Hz, 1H), 3.65-3.57 (m, 2H), 3.49-3.41 (m, 2H), 1.78-1.68 (m, 4H), 1.63-1.51 (m, 2H), 1.23-1.11 (m, 9H), 0.99-0.91 (m, 2H) ppm.

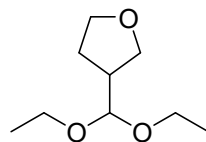

**3-(Diethoxymethyl)tetrahydrofuran(9a)**<sup>[4]</sup>: pale yellow oil, 210.42 mg, 31.8% yield.  **$^1H$  NMR** (400 MHz,  $CDCl_3$ ):  $\delta$  4.33 (d,  $J = 8.0$  Hz, 1H), 3.85-3.80 (m, 2H), 3.73-3.67 (m, 2H), 3.65-3.60 (m, 2H), 3.55-3.45 (m, 2H), 2.60-2.51 (m, 1H), 2.01-1.92 (m, 1H), 1.80-1.71 (m, 1H), 1.22-1.16 (m, 6H) ppm.

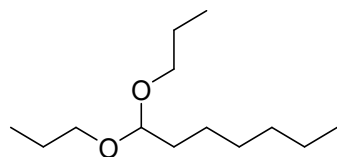

**1,1-Dipropoxyheptane (11a):** pale yellow oil, 713.15 mg, 86.8% yield.  $^1\text{H NMR}$  (400 MHz,  $\text{CDCl}_3$ ):  $\delta$  4.36 (t,  $J = 6.0$  Hz, 1H), 3.46-3.40 (m, 2H), 3.29-3.24 (m, 2H), 1.53-1.44 (m, 6H), 1.21-1.16 (m, 8H), 0.83 (t,  $J = 7.6$  Hz, 6H), 0.78 (t,  $J = 7.2$  Hz, 3H) ppm;  $^{13}\text{C NMR}$  (101 MHz,  $\text{CDCl}_3$ )  $\delta$  103.1, 67.0, 33.4, 31.7, 29.1, 24.7, 23.0, 22.5, 13.9, 10.6 ppm; **FT-IR**  $\nu$  max/cm $^{-1}$  2927.80, 2857.39, 1463.68, 1378.68, 1115.17, 1024.34, 907.23, 730.44, 647.34. HRMS (ESI)  $m/z$ : Calcd. For  $\text{C}_{13}\text{H}_{28}\text{NaO}_2^+$ : 239.1982, Found: 239.1986 ( $\text{M}+\text{Na}^+$ ).

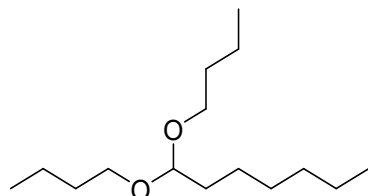

**1,1-Dibutoxyheptane (12a):** pale yellow oil, 799.10 mg, 86.1% yield.  $^1\text{H NMR}$  (400 MHz,  $\text{CDCl}_3$ ):  $\delta$  4.35 (t,  $J = 6.0$  Hz, 1H), 3.49-3.44 (m, 2H), 3.33-3.27 (m, 2H), 1.52-1.41 (m, 6H), 1.34-1.18 (m, 12H), 0.82 (t,  $J = 7.2$  Hz, 6H), 0.78 (t,  $J = 6.8$  Hz, 3H) ppm;  $^{13}\text{C NMR}$  (101 MHz,  $\text{CDCl}_3$ )  $\delta$  103.1, 65.0, 33.4, 32.0, 31.7, 29.1, 24.7, 22.5, 19.4, 13.9, 13.8; **FT-IR**  $\nu$  max/cm $^{-1}$ : 2931.16, 2860.39, 1464.97, 1379.58, 1112.75, 1036.15, 906.34, 729.09, 647.63. HRMS (ESI)  $m/z$ : Calcd. For  $\text{C}_{15}\text{H}_{32}\text{NaO}_2^+$ : 267.2295, Found: 267.2302 ( $\text{M}+\text{Na}^+$ ).

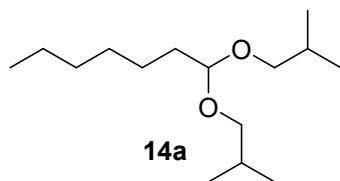

**1,1-Diisobutoxyheptane (14a):** pale yellow oil, 797.25 mg, 85.9% yield.  $^1\text{H NMR}$  (400 MHz,  $\text{CDCl}_3$ ):  $\delta$  4.39 (t,  $J = 6.0$  Hz, 1H), 3.30-3.27 (m, 2H), 3.12-3.09 (m, 2H), 1.78-1.76 (m, 2H), 1.56-1.55 (m, 2H), 1.23 (m, 8H), 0.86-0.83 (m, 15H) ppm;  $^{13}\text{C NMR}$  (101 MHz,  $\text{CDCl}_3$ )  $\delta$  103.4, 72.2, 33.5, 31.9, 29.3, 28.8, 24.9, 22.7, 19.6, 14.1 ppm; **FT-IR**  $\nu$  max/cm $^{-1}$ : 2930.5, 2872.5, 1461.7, 1376.3, 1111.9, 1033.9, 902.1, 726.1, 646.7. HRMS (ESI)  $m/z$ : Calcd. For  $\text{C}_{15}\text{H}_{32}\text{NaO}_2^+$ : 267.2295, Found: 267.2303 ( $\text{M}+\text{Na}^+$ ).

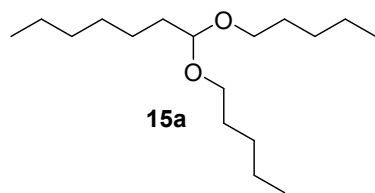

**1,1-Bis(pentyloxy)heptane (15a):** pale yellow oil, 847.36 mg, 81.9%.  $^1\text{H NMR}$  (400 MHz,  $\text{CDCl}_3$ ):  $\delta$  4.45 (t,  $J = 4.0$  Hz, 1H), 3.57-3.53 (m, 2H), 3.42-3.37 (m, 2H), 1.61-1.55 (m, 6H), 1.33-1.25 (m, 16H), 0.90-0.86 (m, 9H) ppm;  $^{13}\text{C NMR}$  (101 MHz,  $\text{CDCl}_3$ )  $\delta$  103.2, 65.4, 33.5, 31.8, 29.6, 29.1, 28.5, 24.8, 22.6, 22.5, 14.1, 14.04, 14.01 ppm; **FT-IR**  $\nu_{\text{max}}/\text{cm}^{-1}$ : 2928.5, 2873.6, 1458.7, 1372.3, 1114.9, 1030.8, 901.1, 724.2, 649.2. HRMS (ESI)  $m/z$ : Calcd. For  $\text{C}_{17}\text{H}_{36}\text{NaO}_2^+$ : 295.2608, Found: 295.2612 ( $\text{M}+\text{Na}^+$ ).

## 8. Recycling tests of the ZSM-35(10) in tandem hydroformylation-acetalization of 1-hexene with EtOH

The recycling tests are followed the general procedure for tandem hydroformylation-acetalization of olefins. The ZSM-35(10) was separated from the mixture by using centrifuge, washed by EtOH, and heated at 120 °C for 8 h under vacuum condition. The reactivated ZSM-35(10) was used to test next recycling reaction with the same condition and procedure.

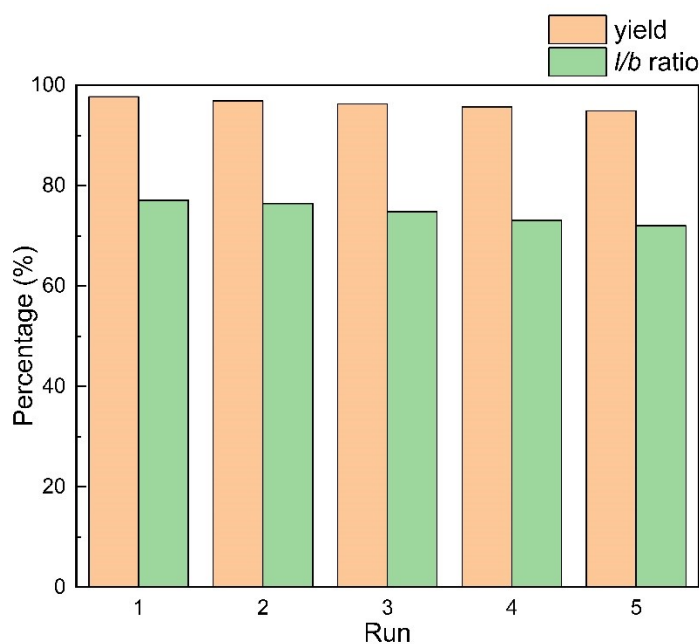

**Figure S12. Recycling tests of ZSM-35(10)**

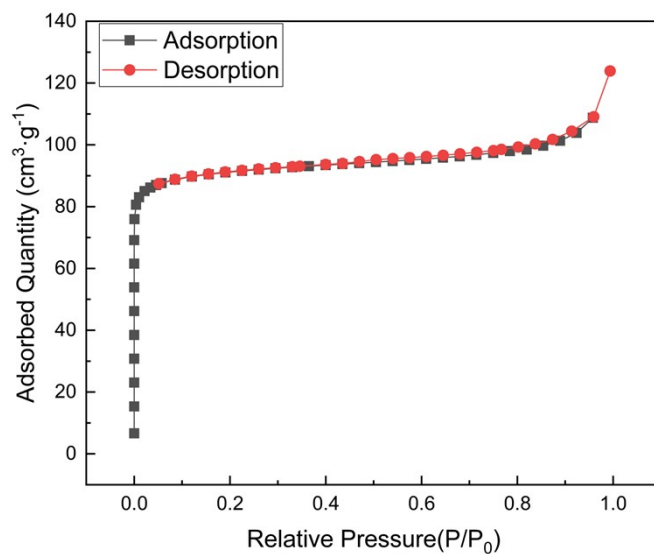

**Figure S13. N<sub>2</sub> sorption isotherm of recovered ZSM-35(10)**

The Brunauer–Emmett–Teller (BET) surface area and pore volume of recovered ZSM-35(10) are 264.2 m<sup>2</sup>/g and 0.15 cm<sup>3</sup>/g, respectively.

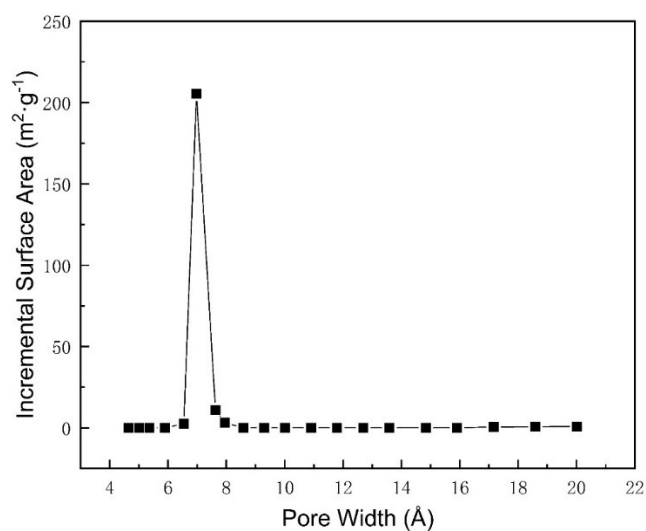

**Figure S14. pore size distribution of recovered ZSM-35(10)**

## 9. NMR spectra of major products

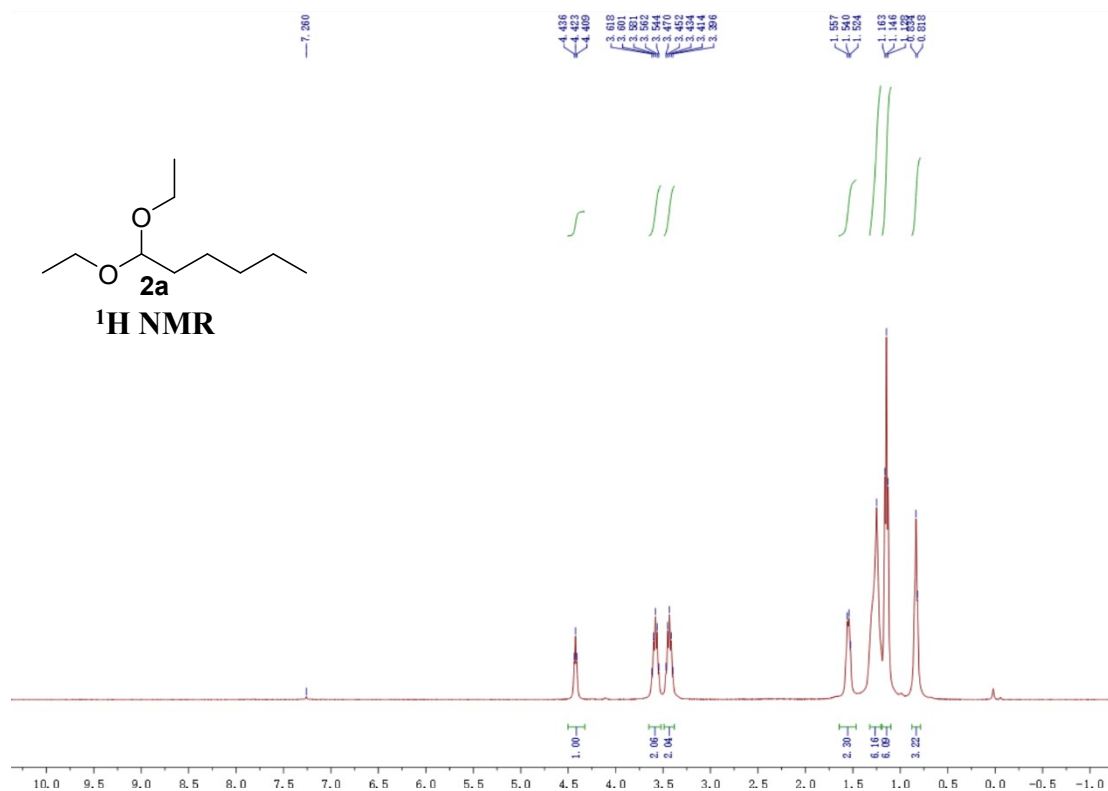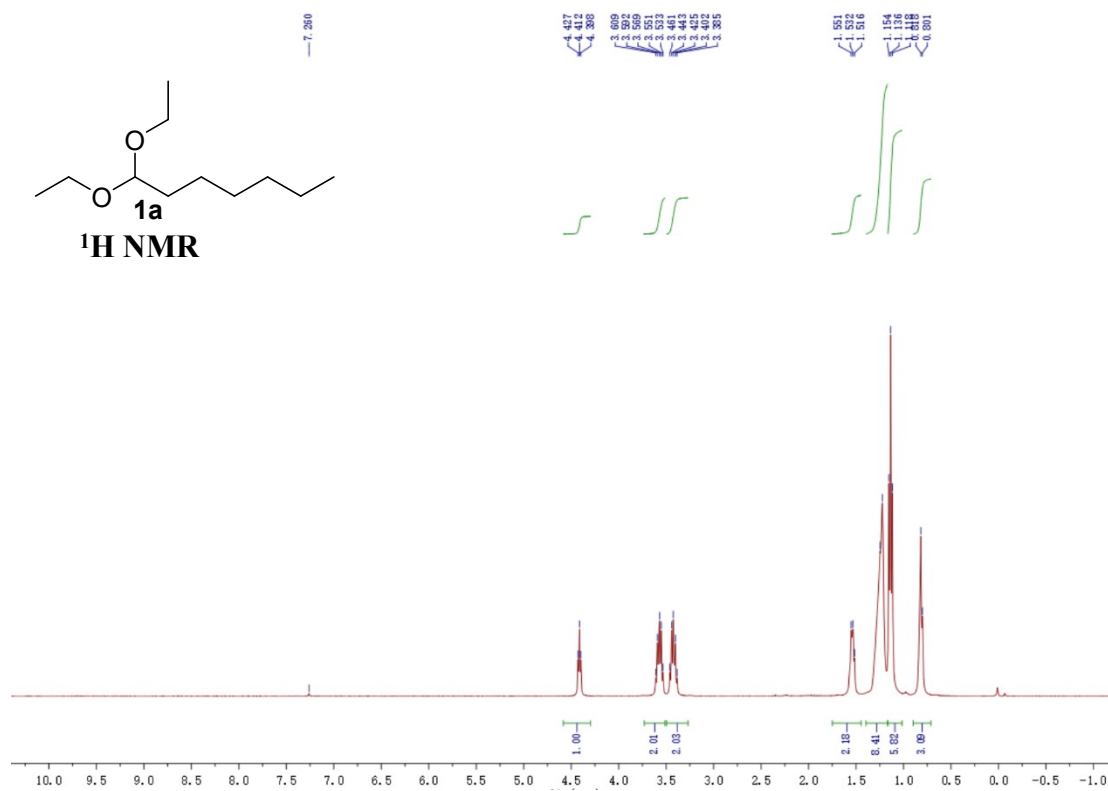



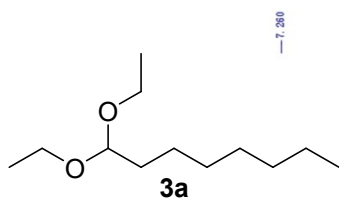

**<sup>1</sup>H NMR**

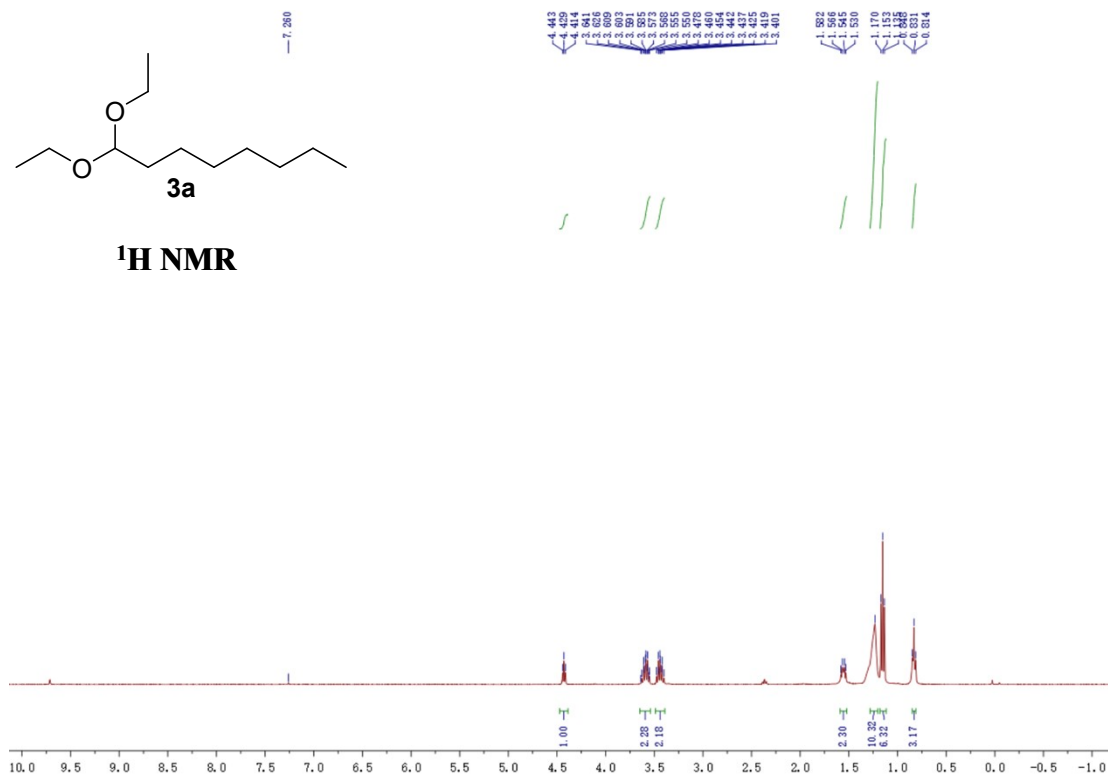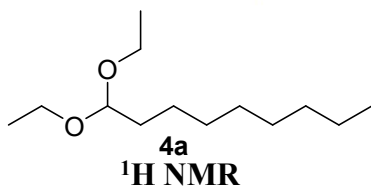

**<sup>1</sup>H NMR**

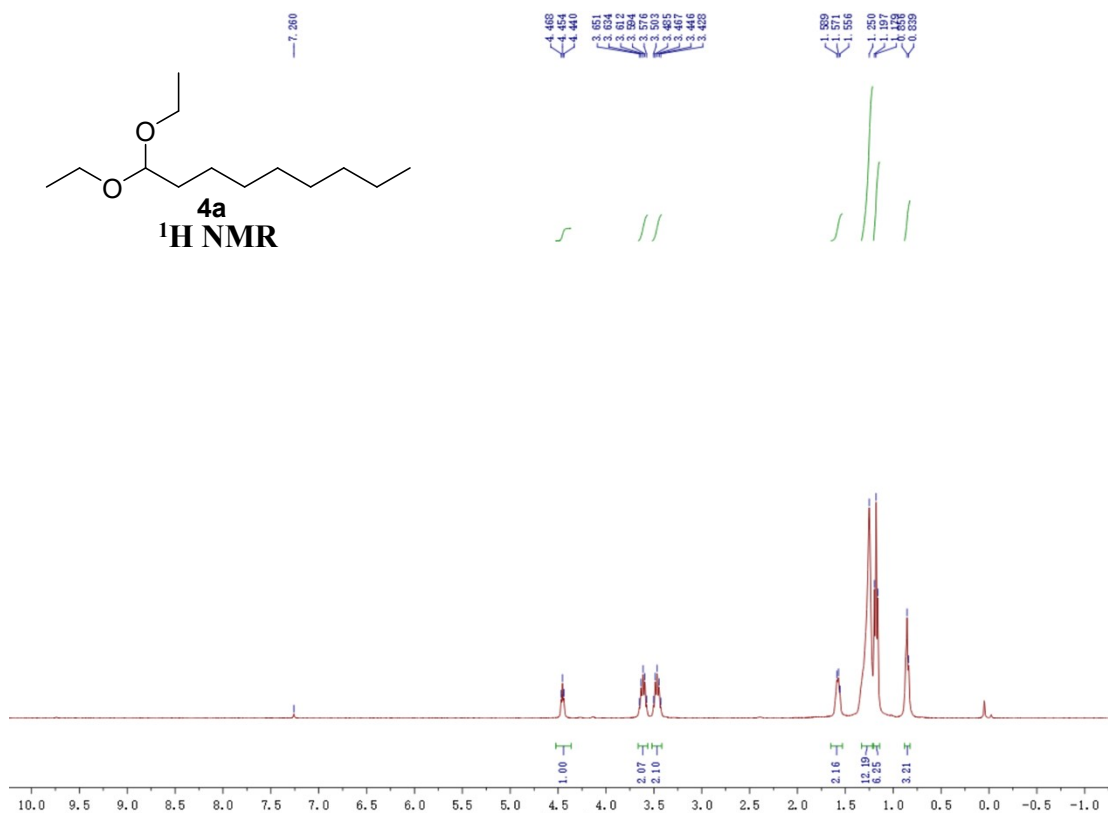

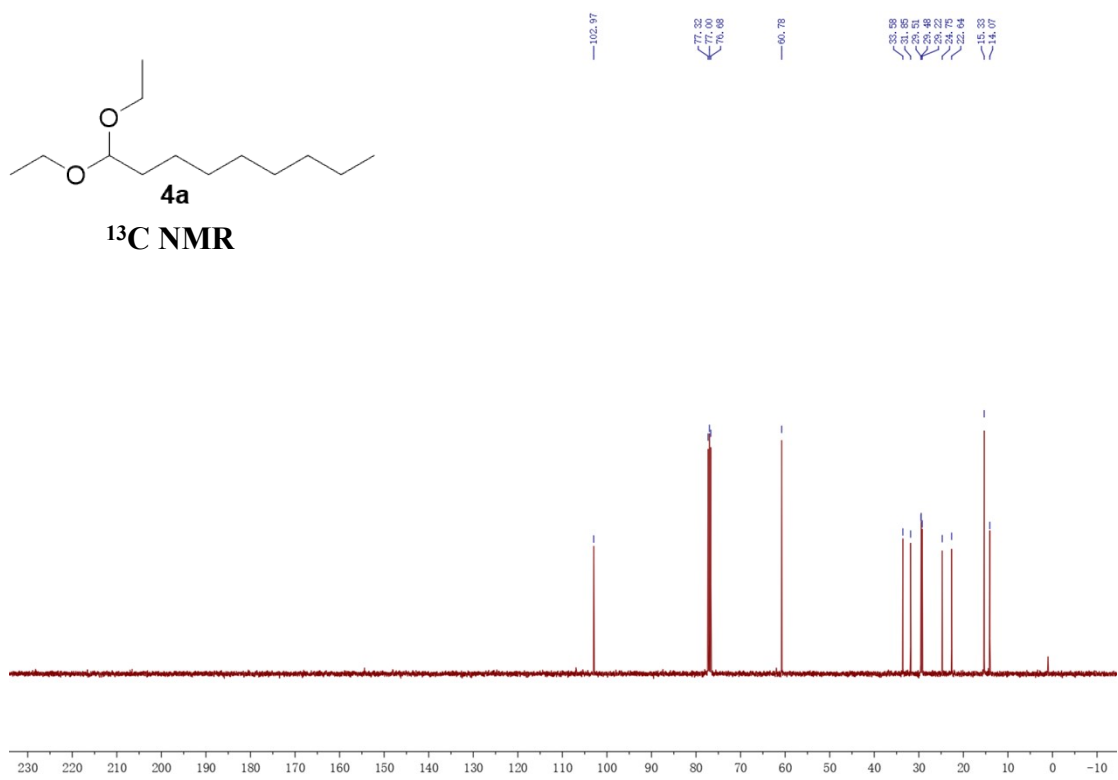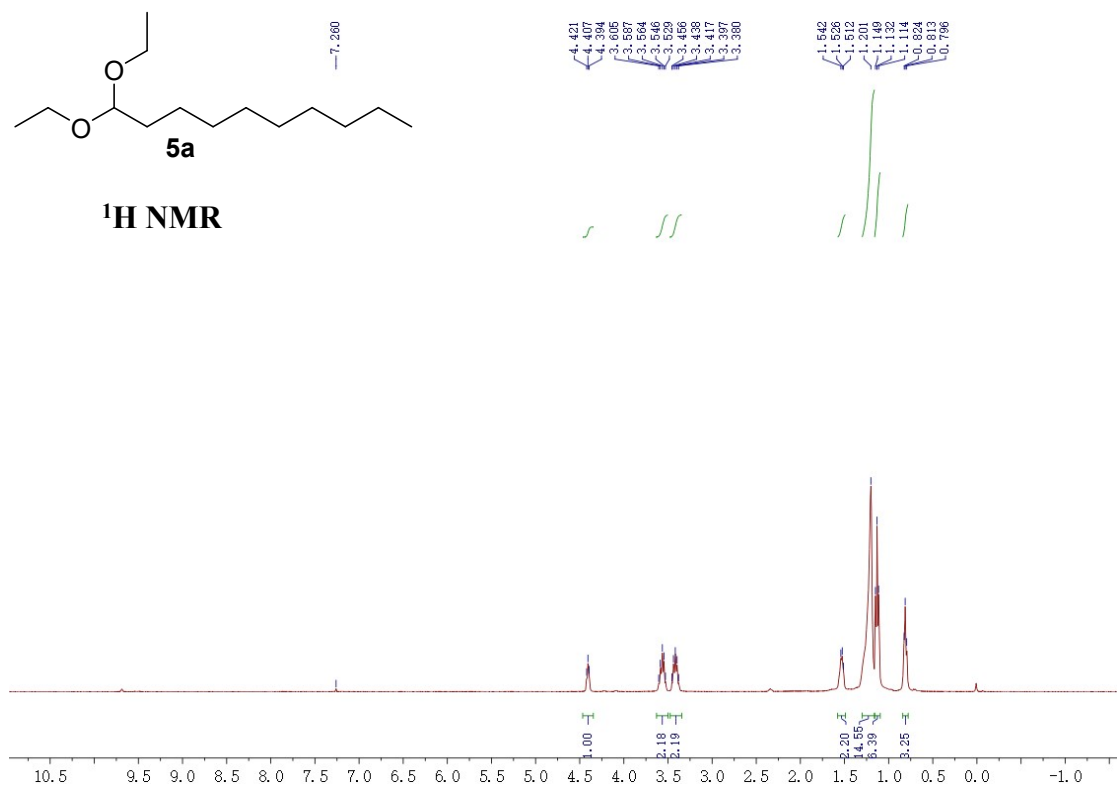

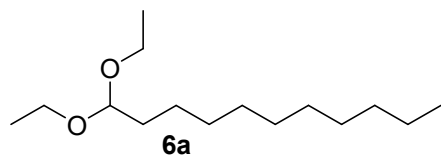

<sup>1</sup>H NMR

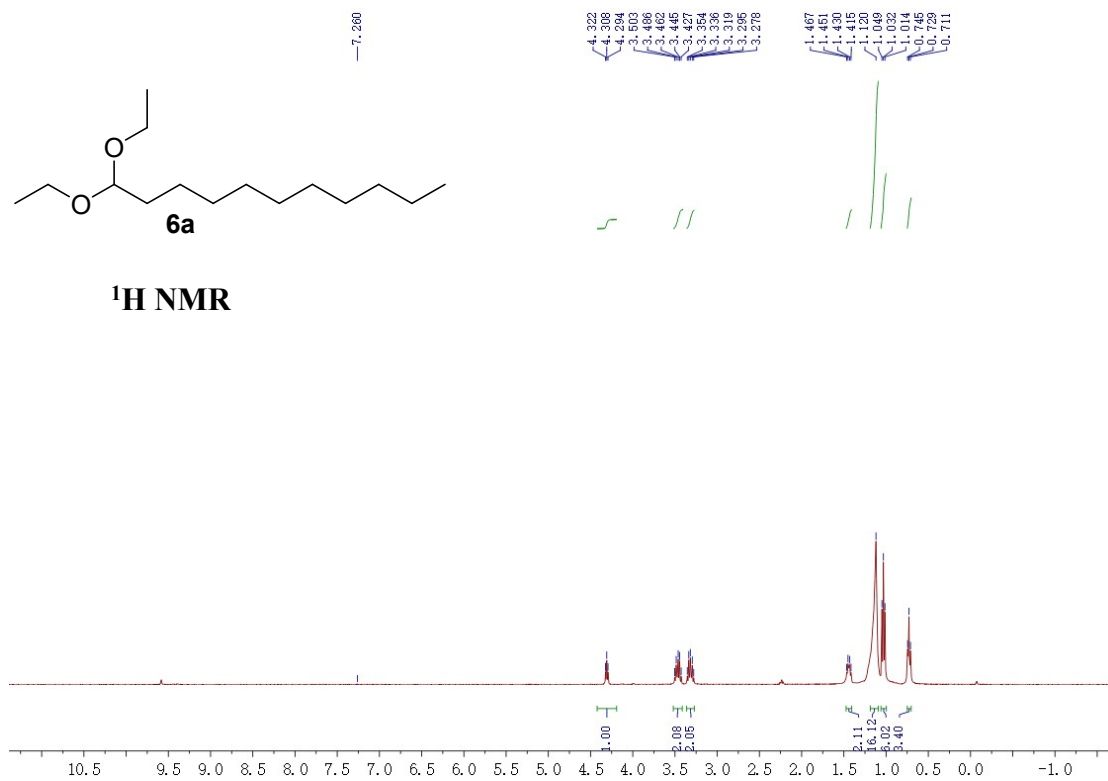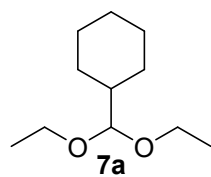

<sup>1</sup>H NMR

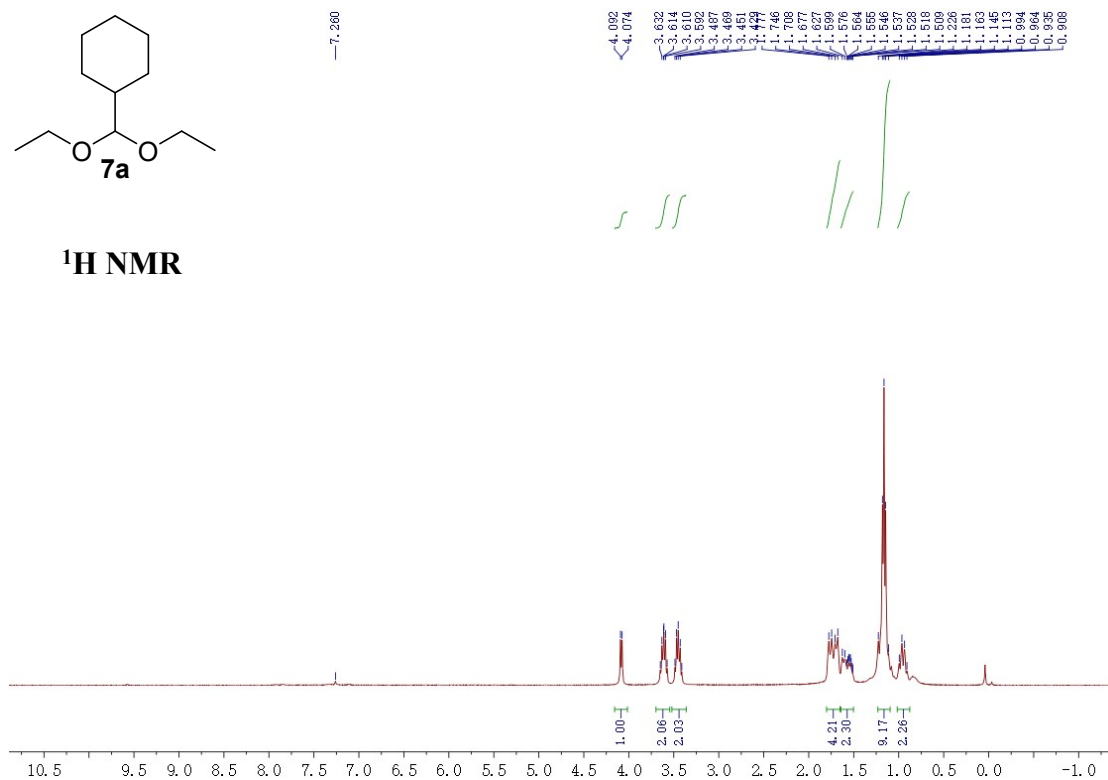

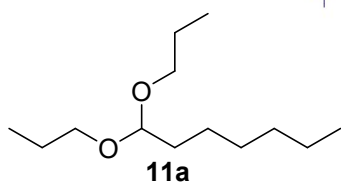

**<sup>1</sup>H NMR**

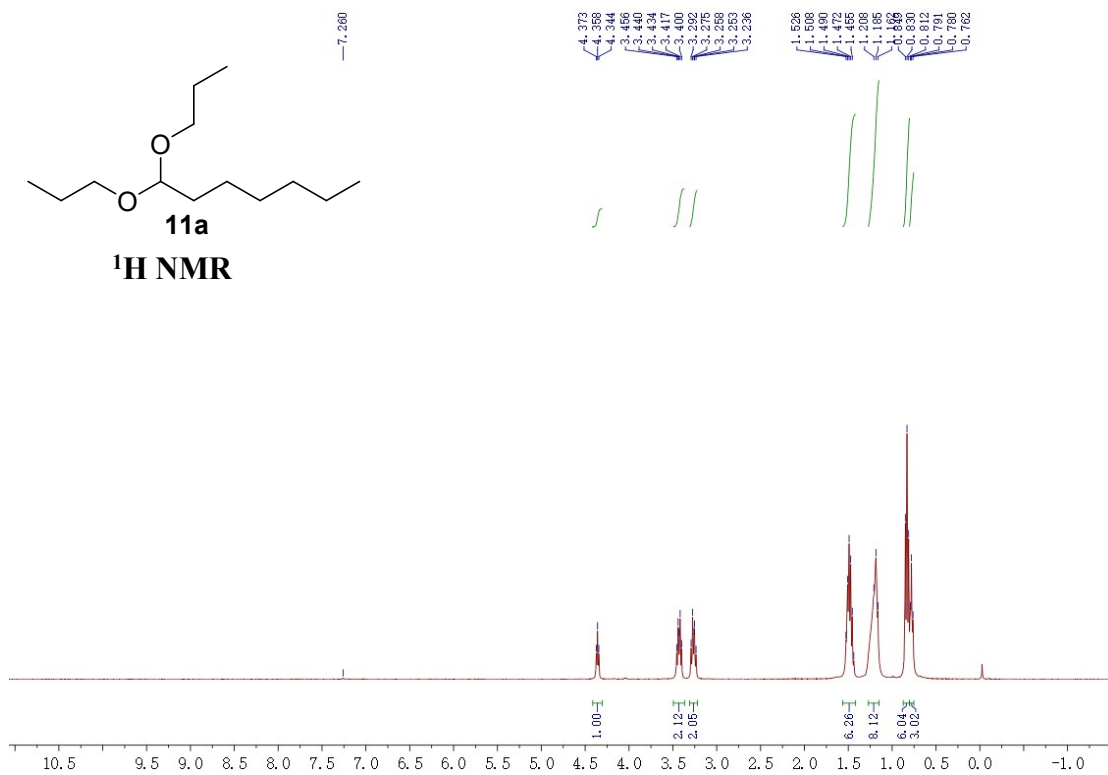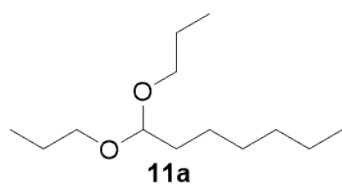

**<sup>13</sup>C NMR**

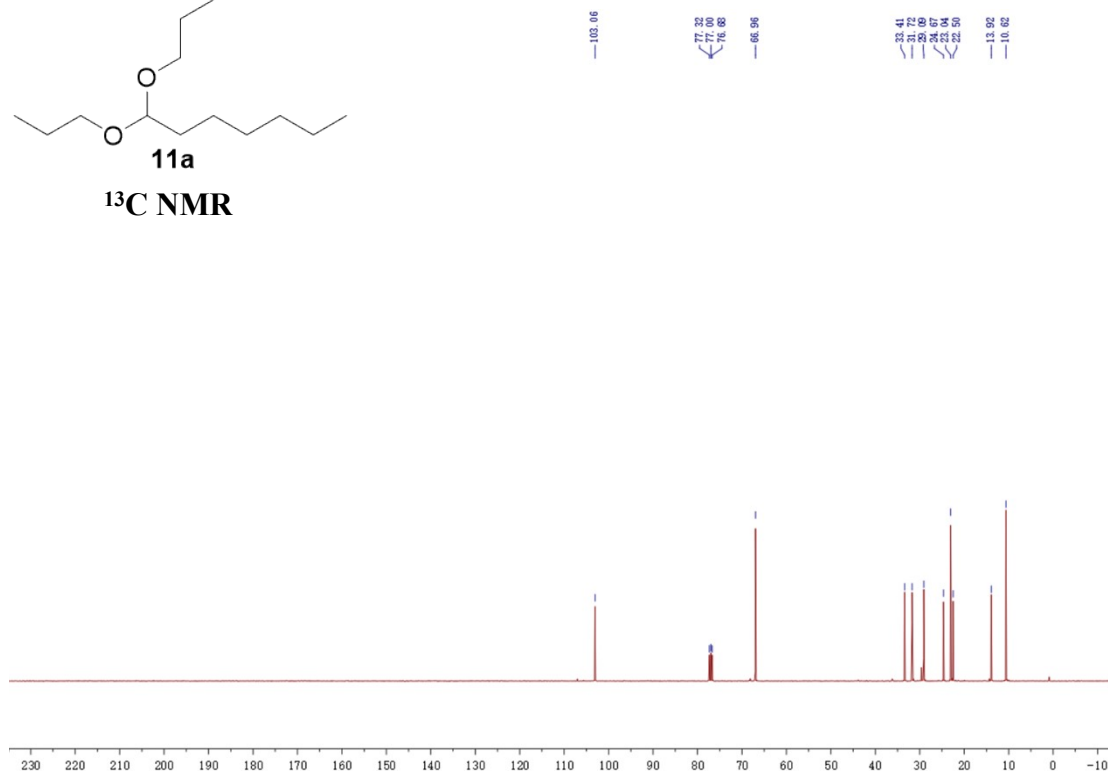

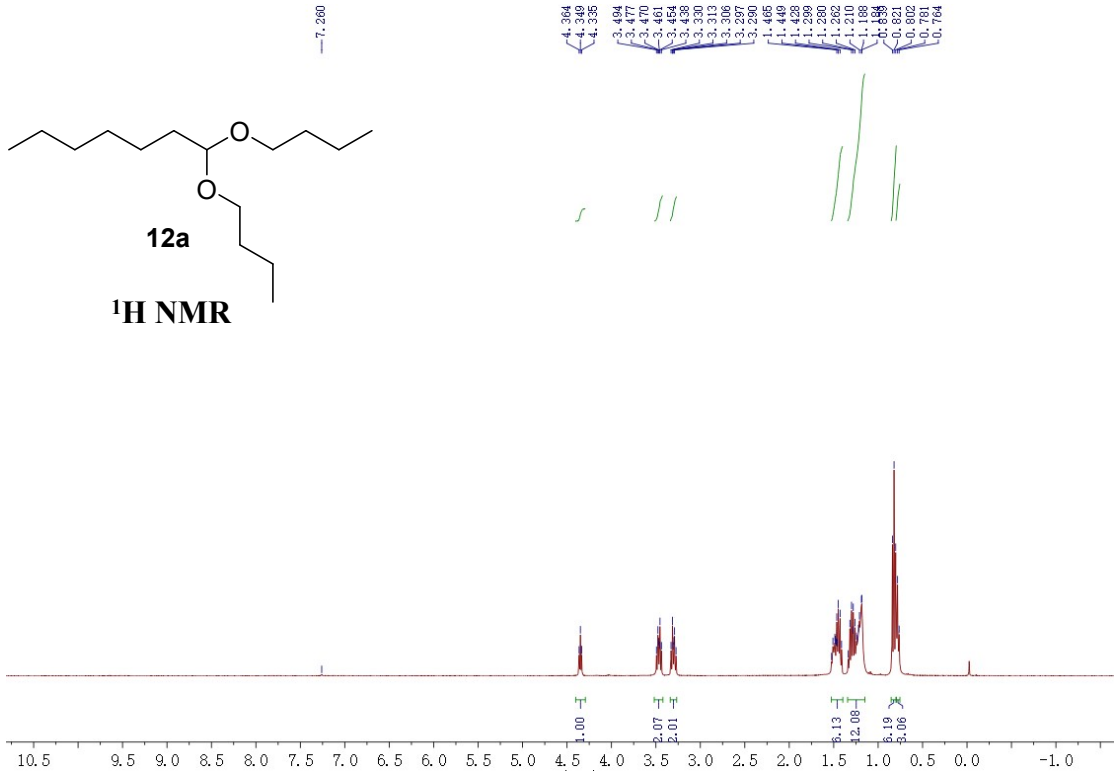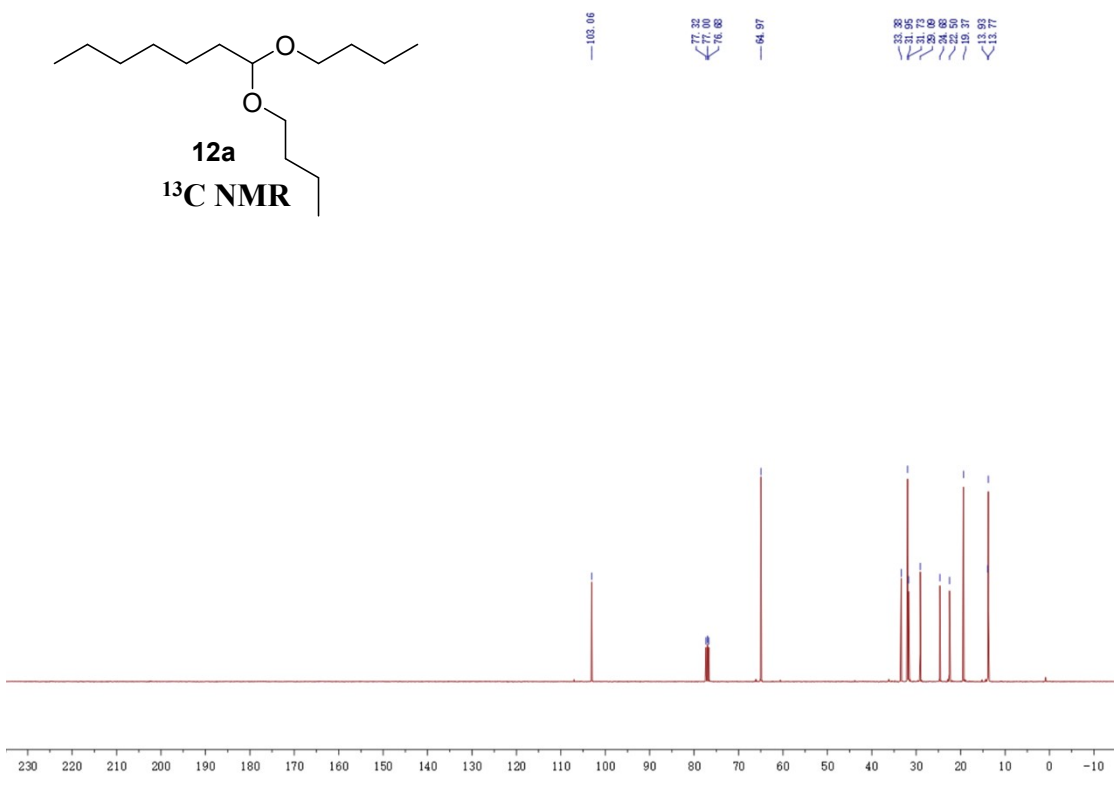

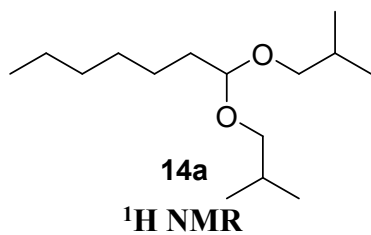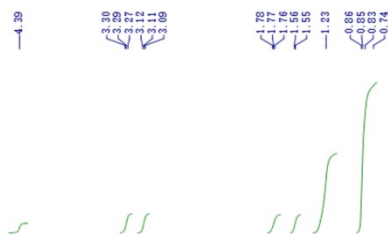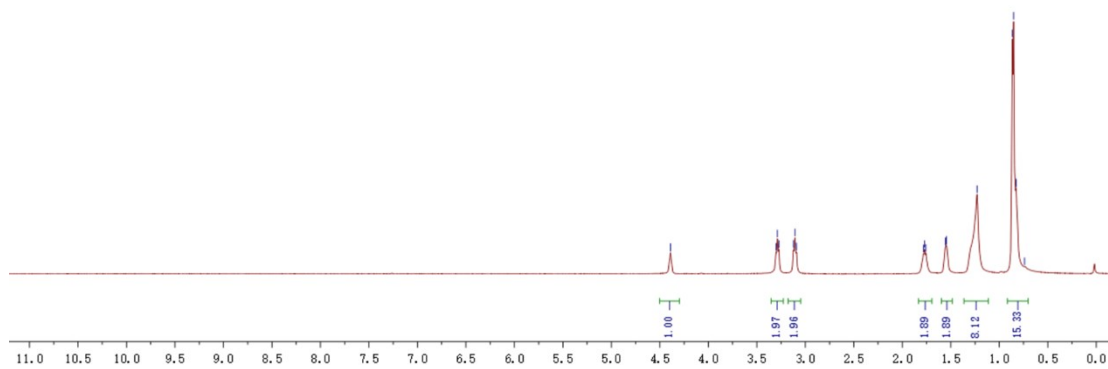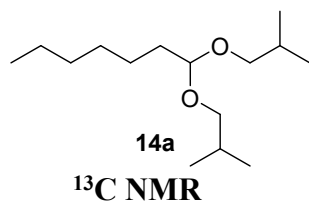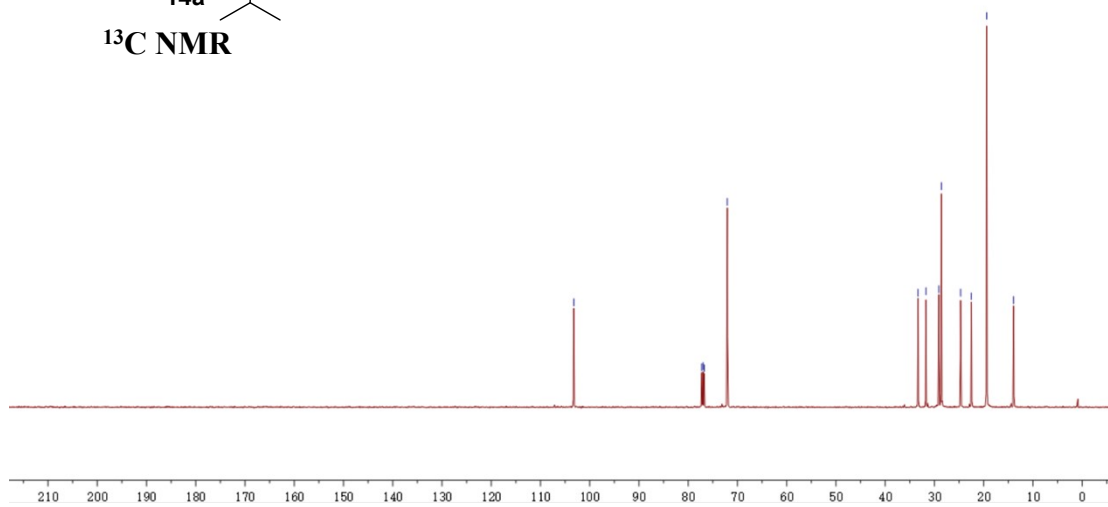

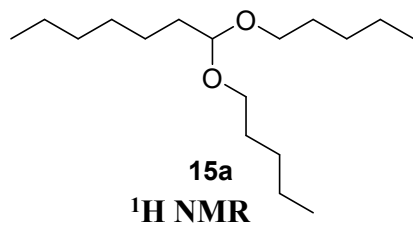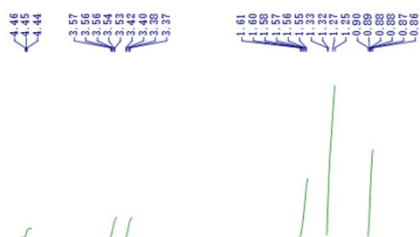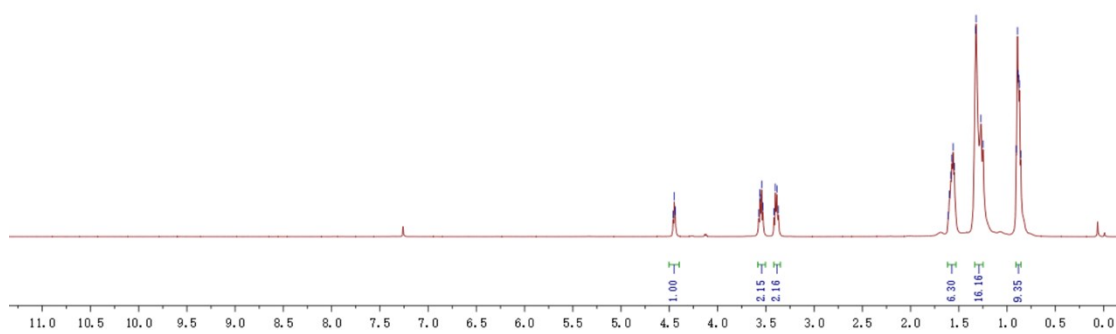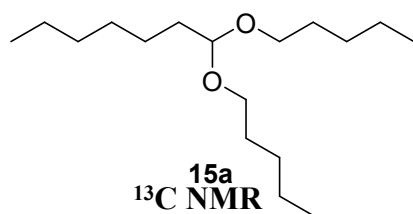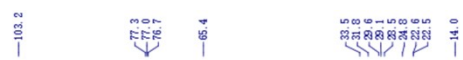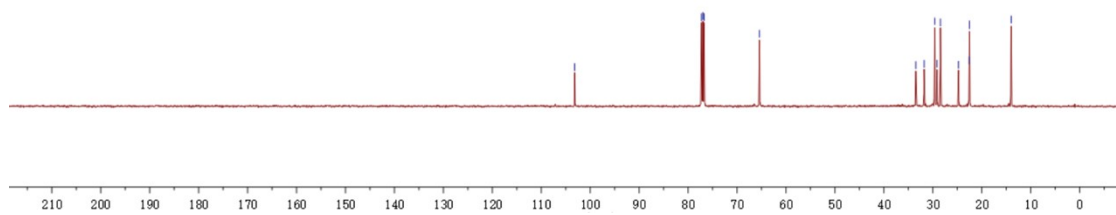

## 10. GC data for Table 1

entry 1:

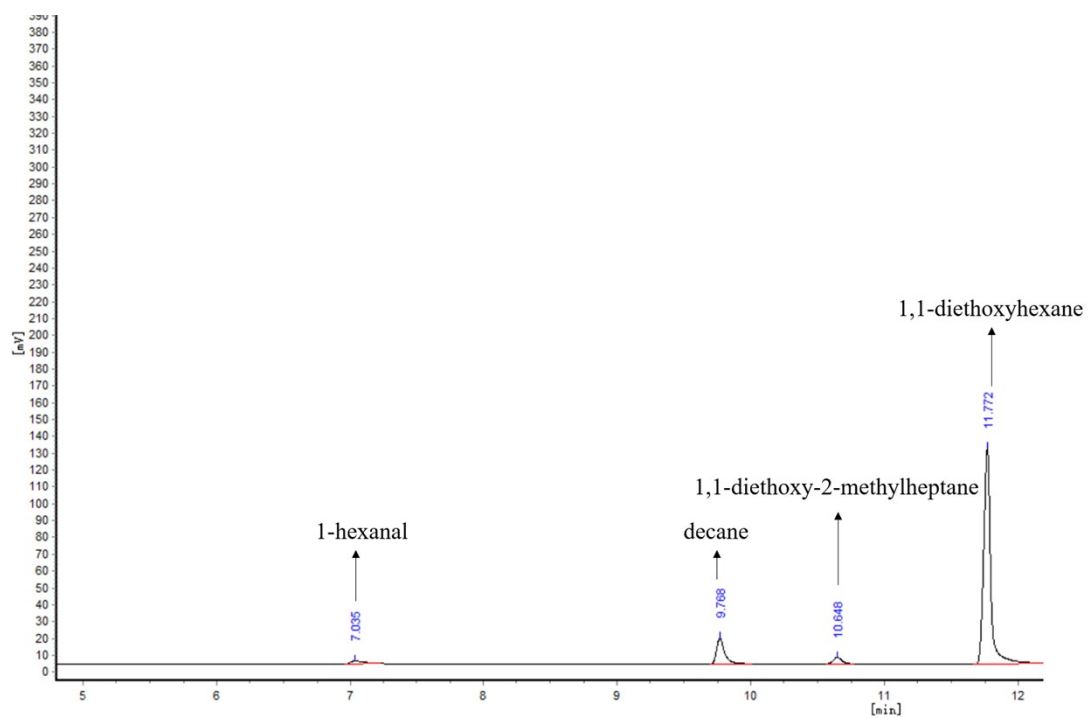

entry 2:

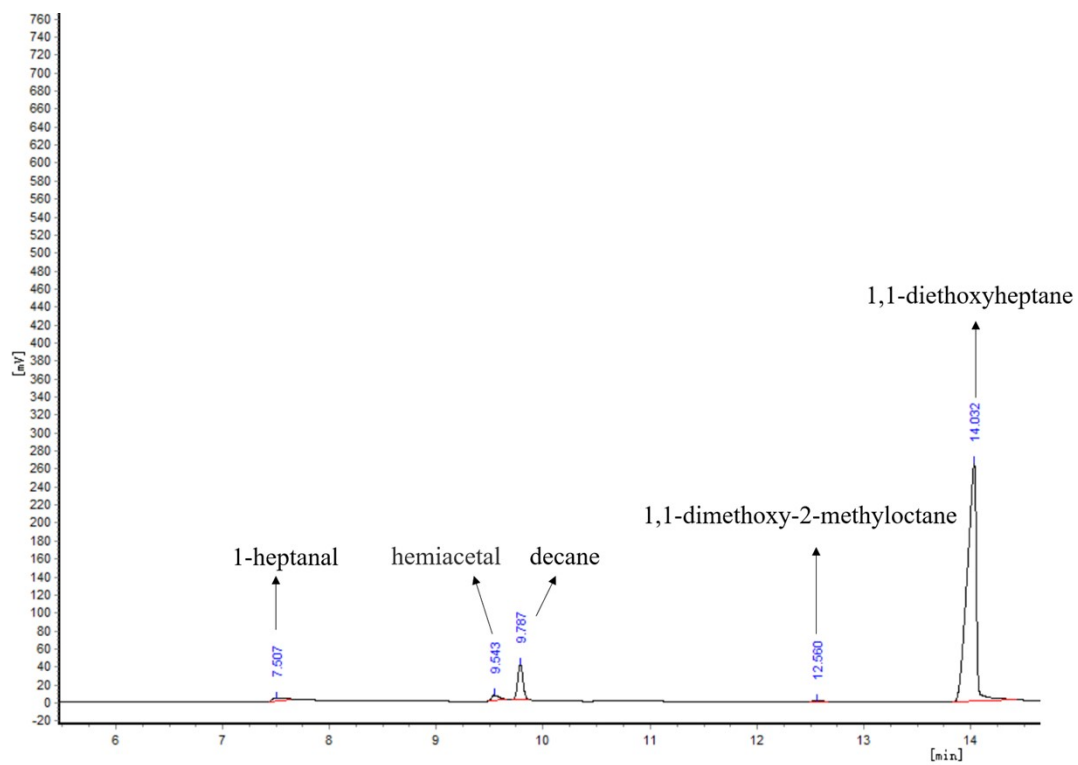



entry 3:

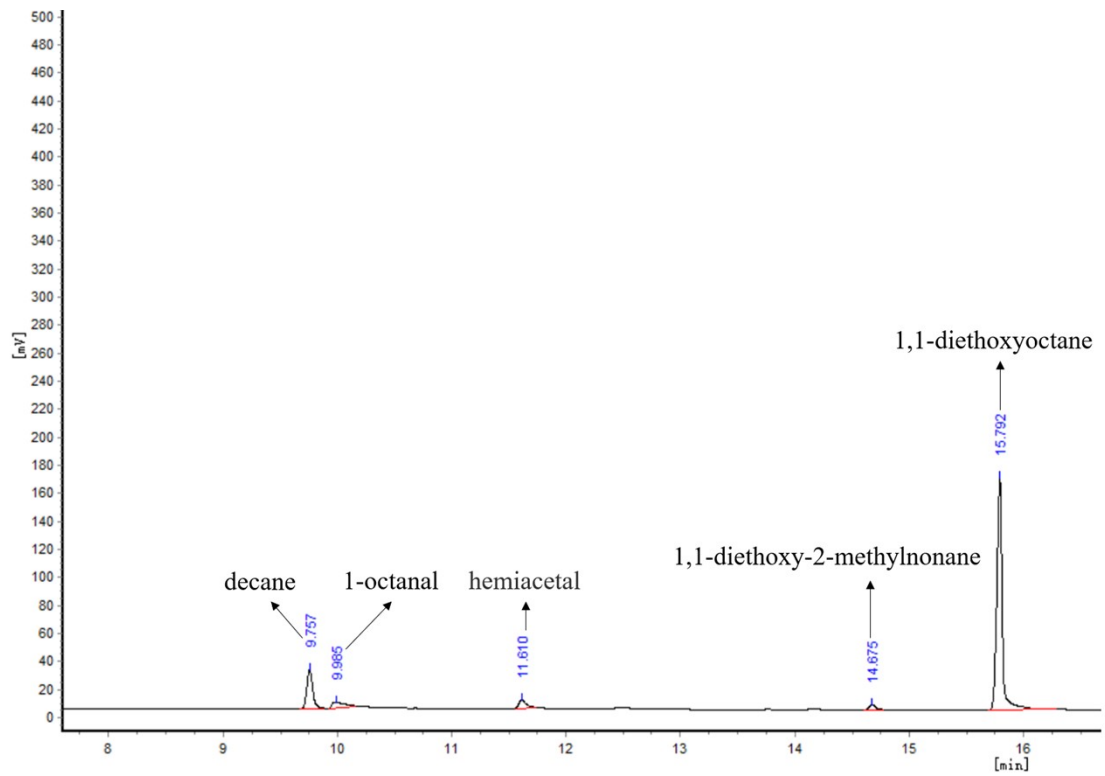

Entry 4:

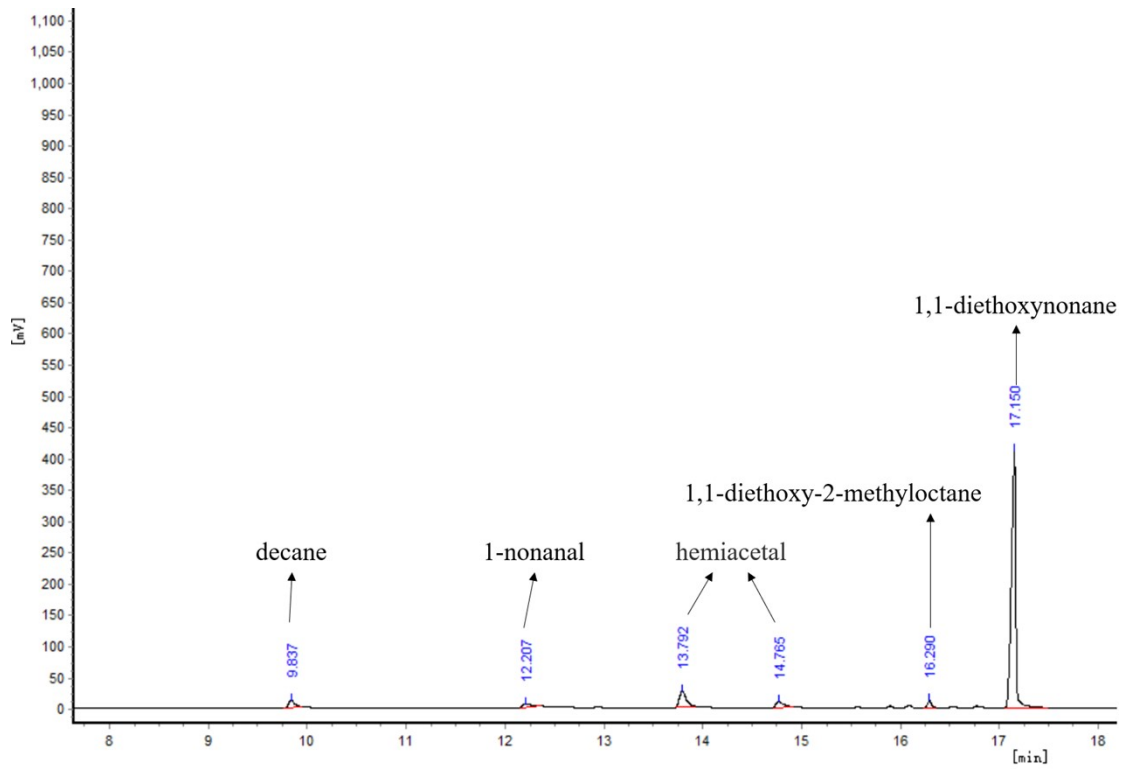

Entry 5:

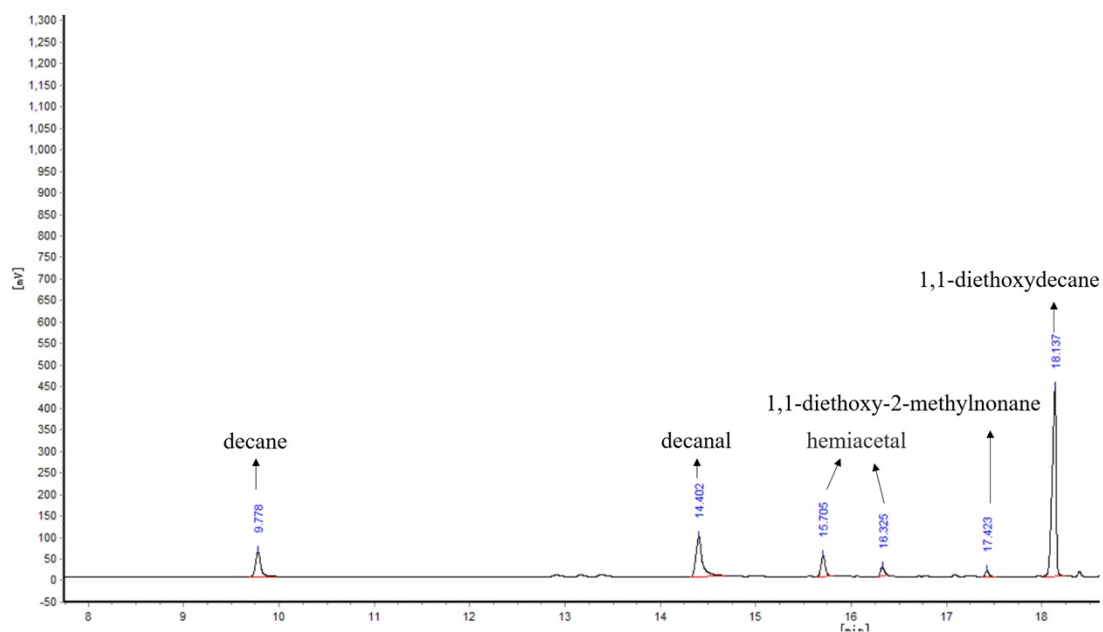

Entry 6:

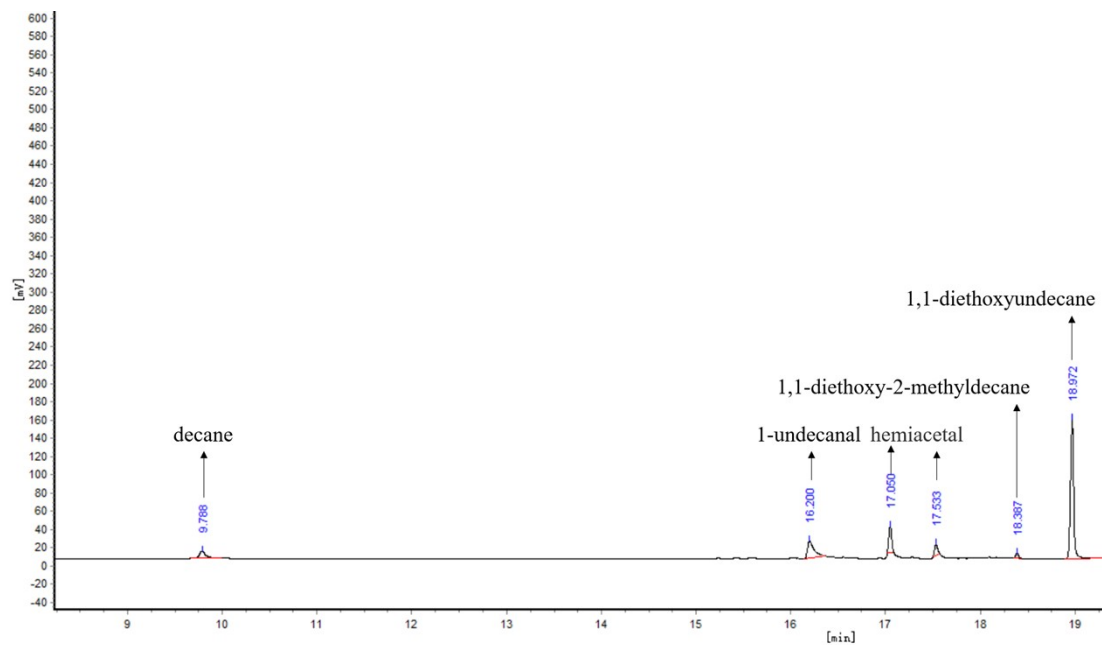

Entry 7:

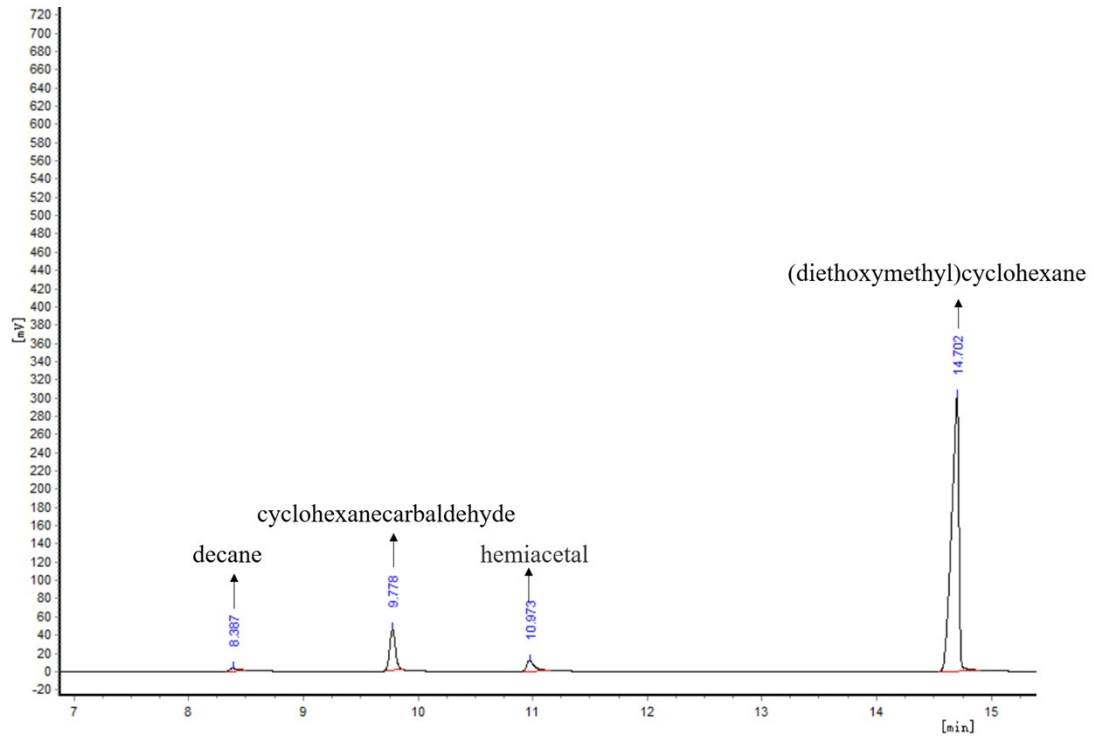

Entry 8:

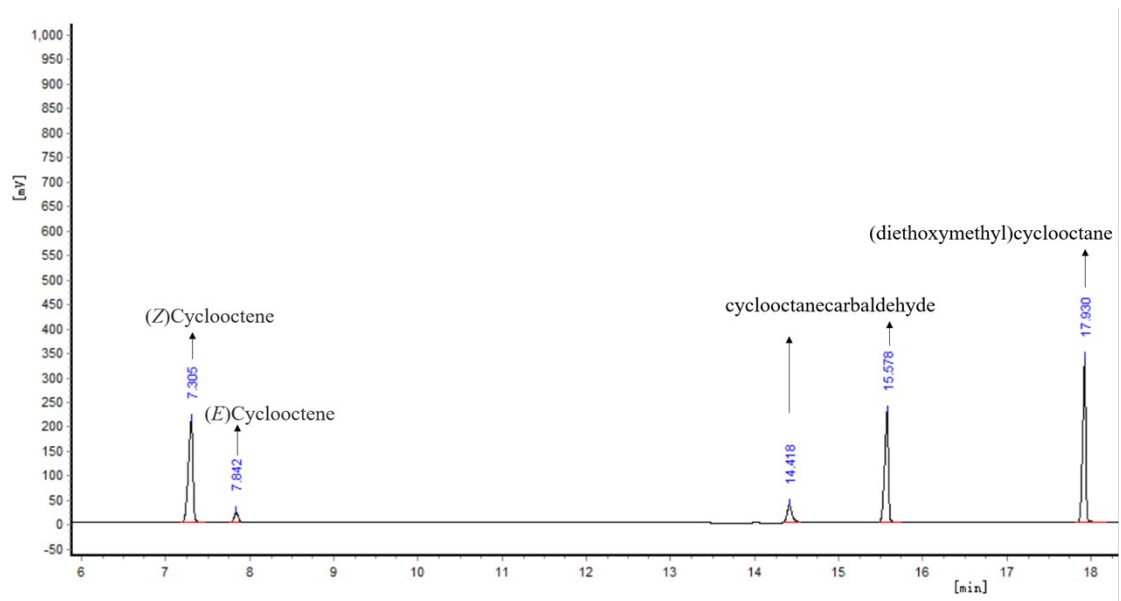

Entry 9:

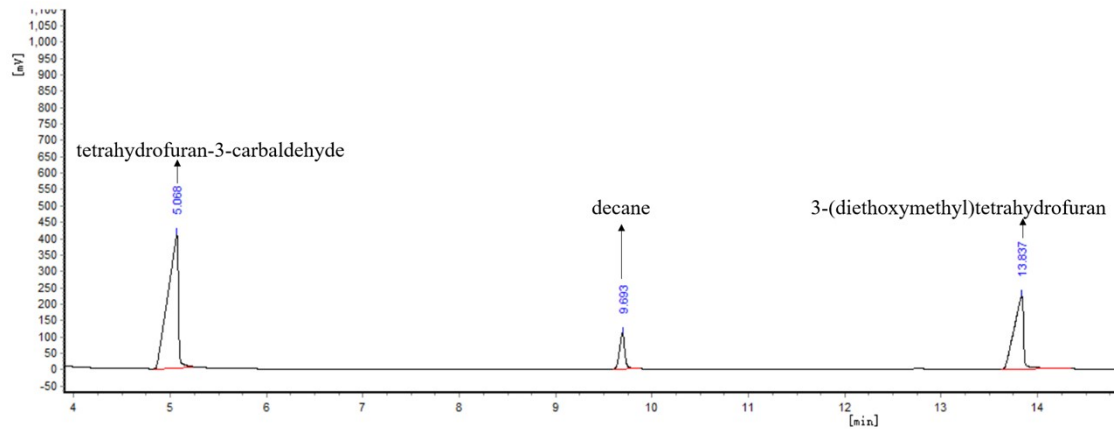

Entry 10:

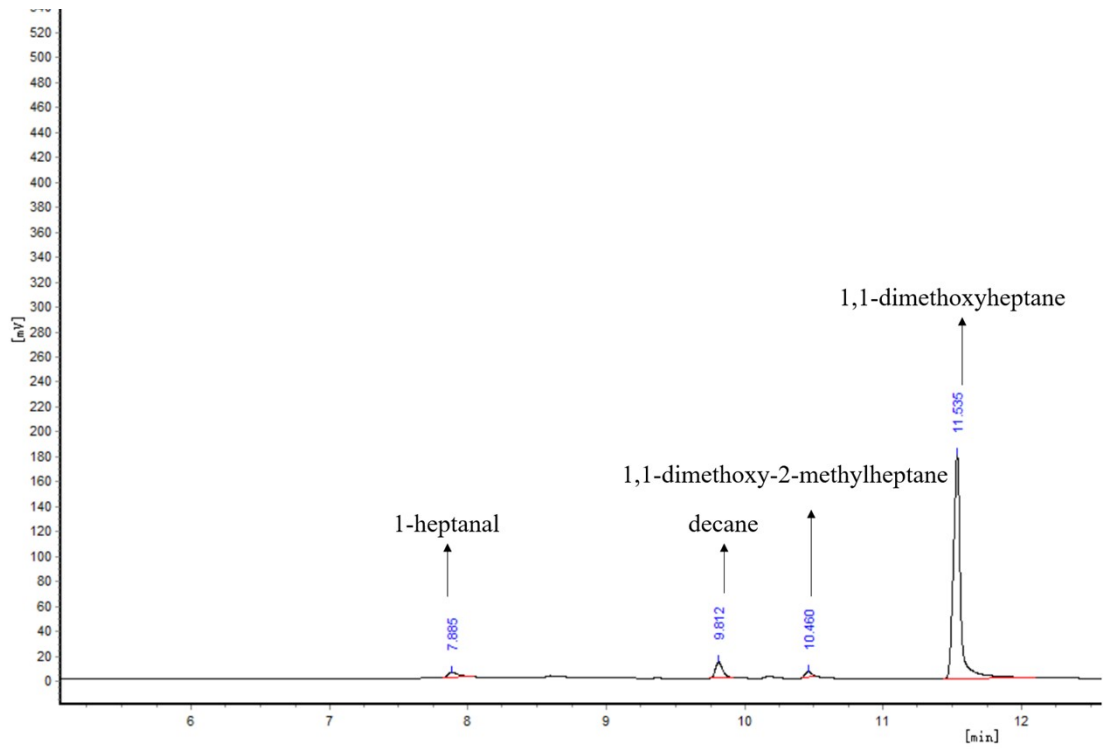

Entry 11:

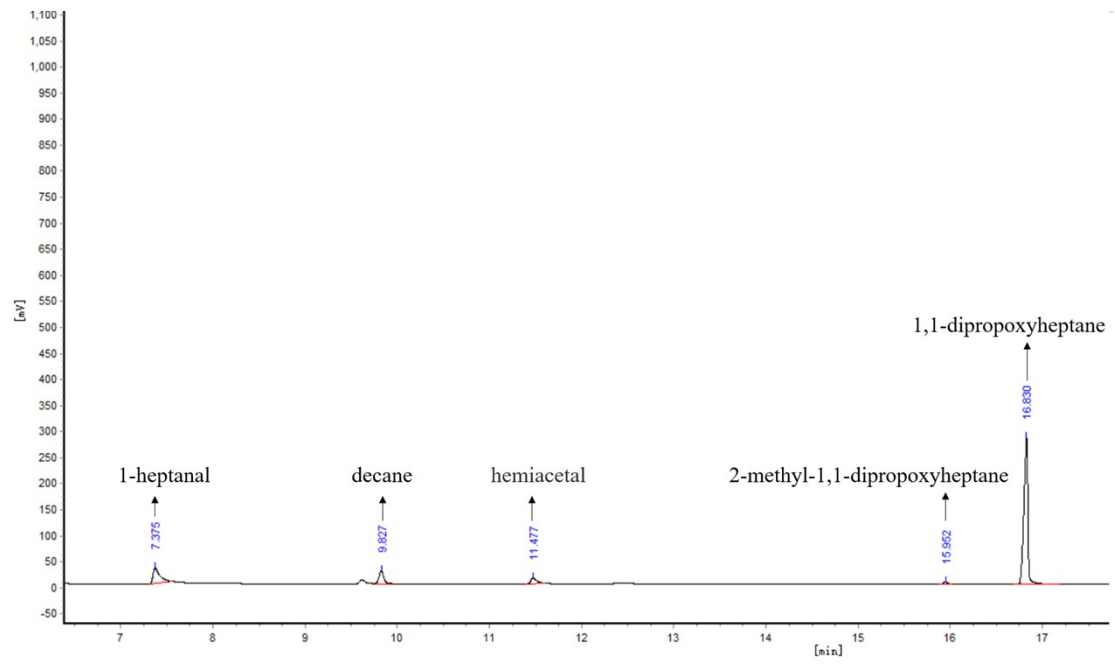

Entry 12:

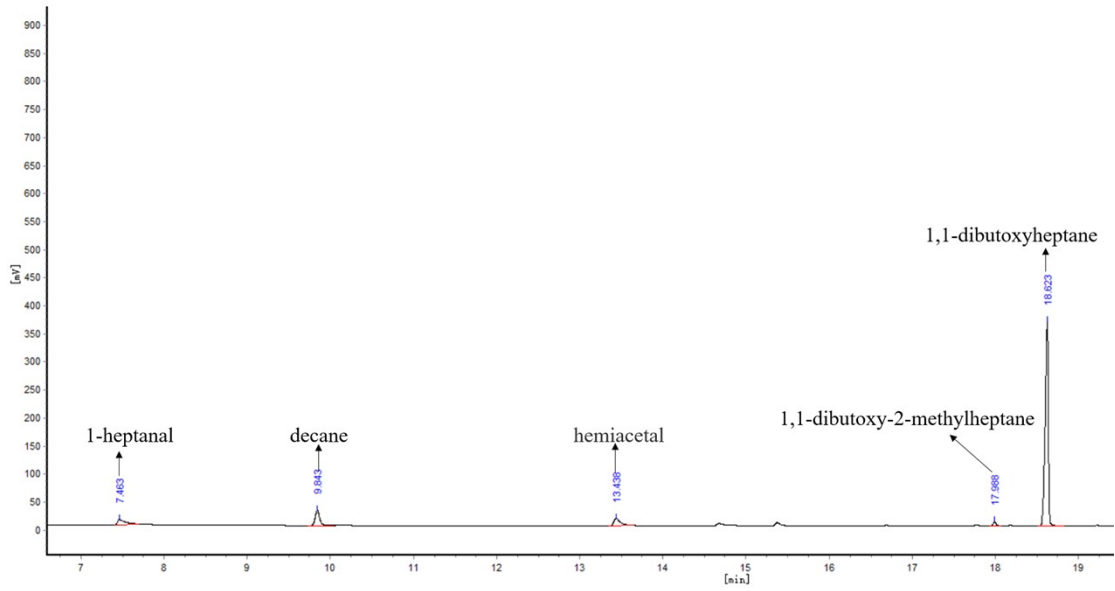

Entry 13:

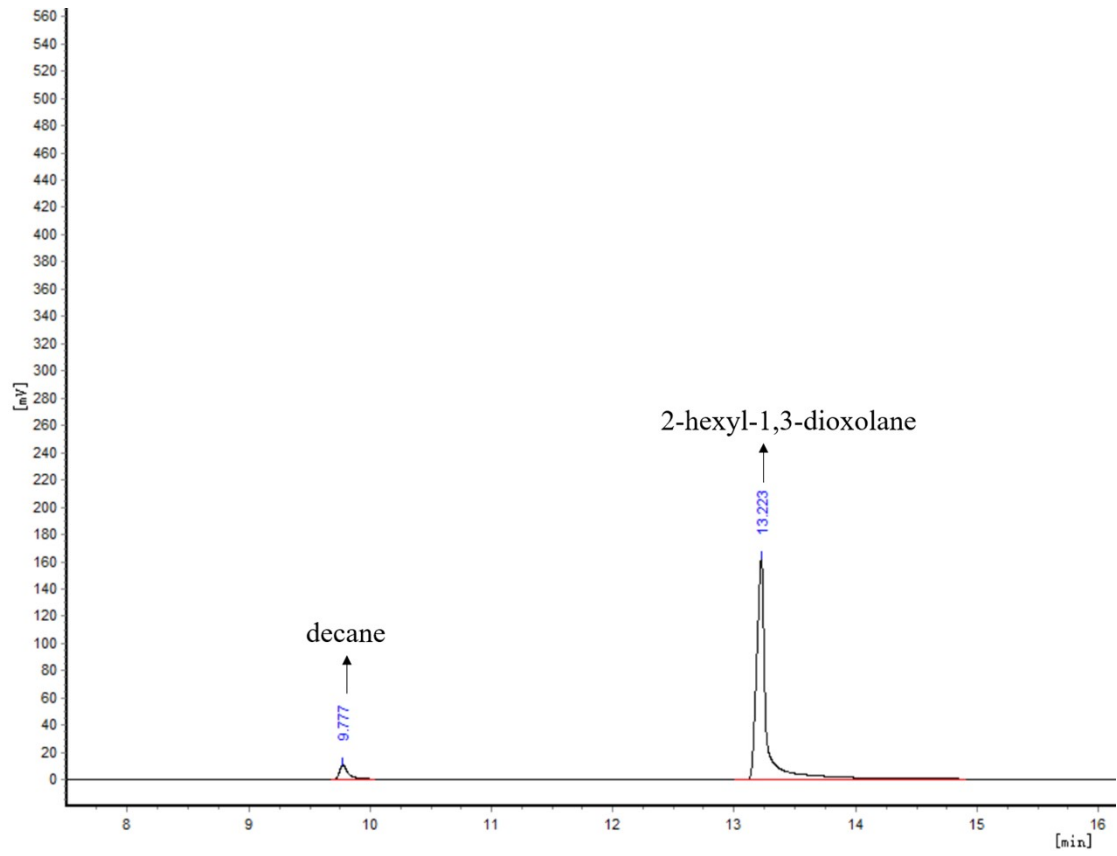

Entry 14

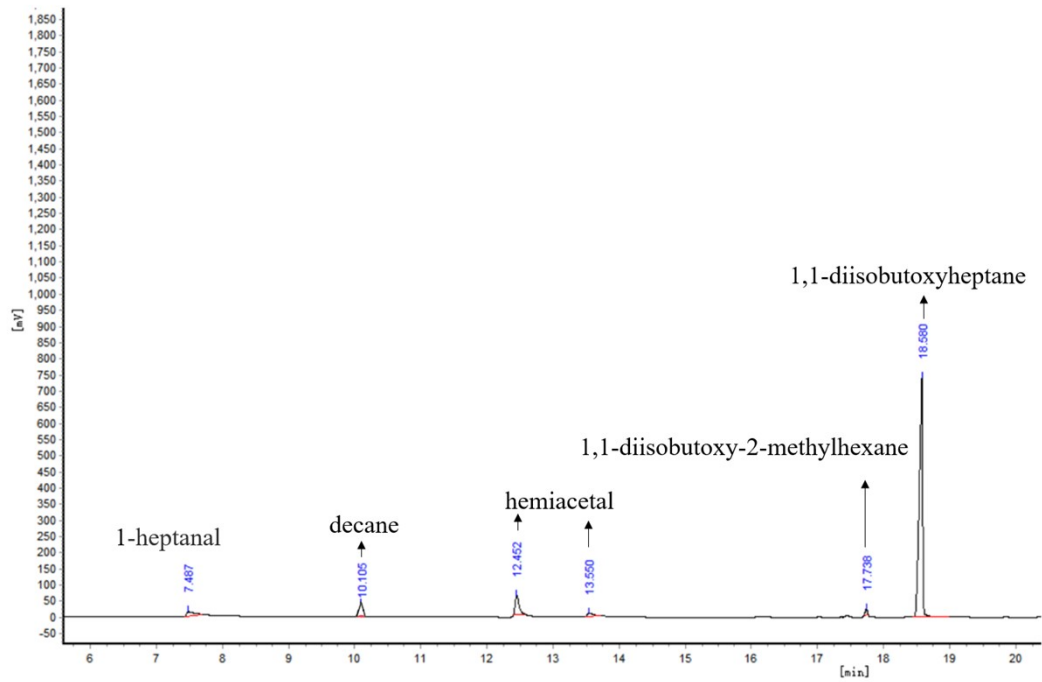

Entry 15

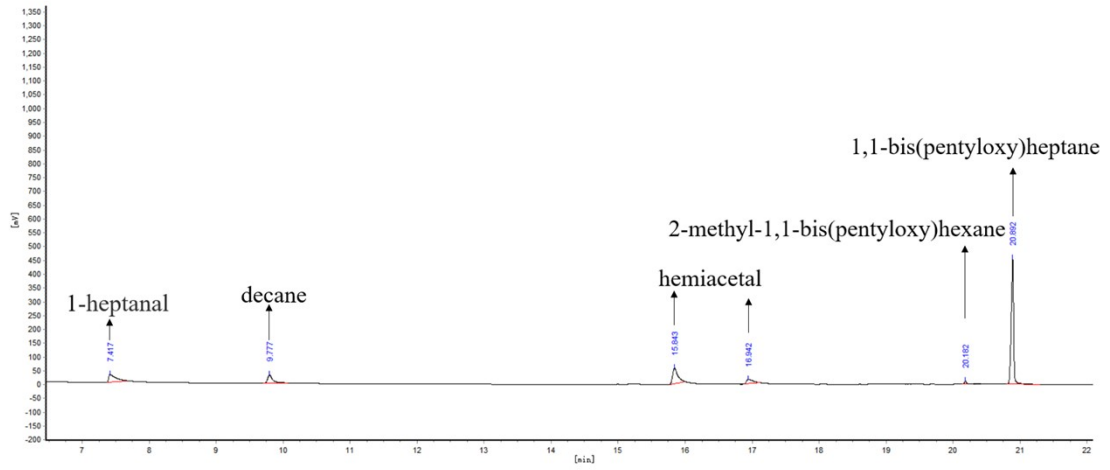

Entry 16:

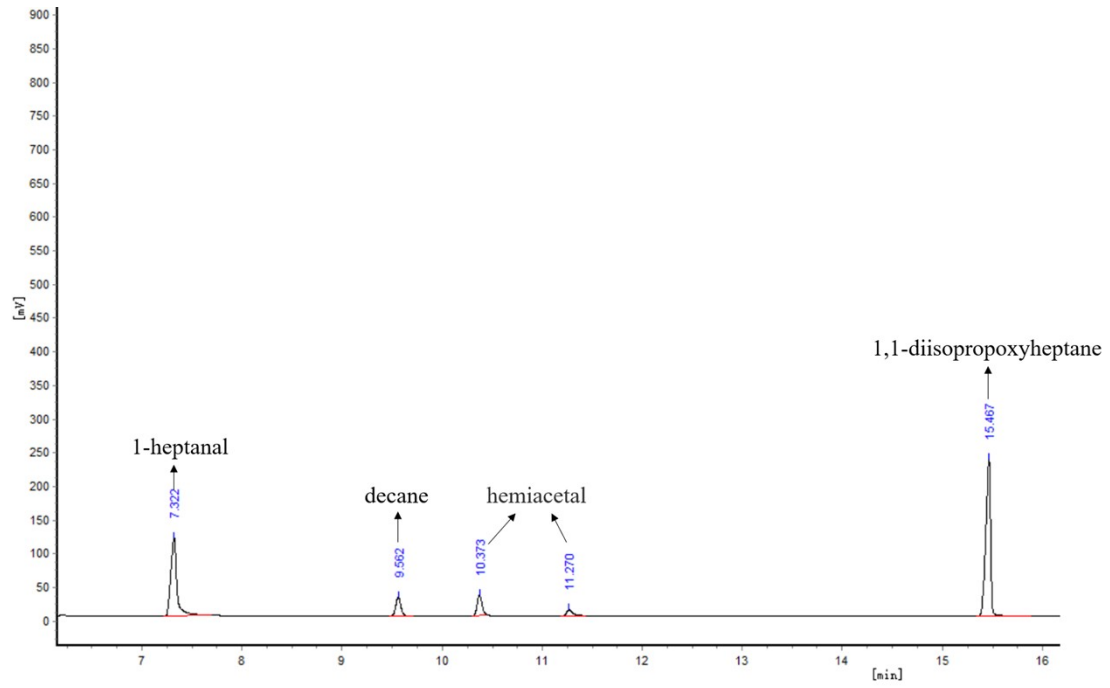

## 11. Standard orientation, imaginary frequencies of all stationary

### points

The DFT method with M062X(D3) functional at the basis set level of 6-311G (d, p) were performed using Gaussian 16 package.<sup>[5]</sup>

#### Structure 1

| Center<br>Number | Atomic<br>Number | Atomic<br>Type | Coordinates (Angstroms) |           |           |
|------------------|------------------|----------------|-------------------------|-----------|-----------|
|                  |                  |                | X                       | Y         | Z         |
| 1                | 6                | 0              | -3.267393               | 0.038352  | -0.000638 |
| 2                | 6                | 0              | -2.015912               | -0.410318 | 0.000464  |
| 3                | 1                | 0              | -4.113366               | -0.639643 | -0.000511 |
| 4                | 1                | 0              | -3.495473               | 1.100733  | -0.001715 |
| 5                | 1                | 0              | -1.849350               | -1.486648 | 0.001486  |
| 6                | 6                | 0              | -0.773702               | 0.455124  | 0.000473  |
| 7                | 1                | 0              | -0.790353               | 1.116769  | -0.874410 |
| 8                | 1                | 0              | -0.790046               | 1.116289  | 0.875733  |
| 9                | 6                | 0              | 0.532499                | -0.348320 | 0.000047  |
| 10               | 1                | 0              | 0.550532                | -1.008056 | 0.877004  |
| 11               | 1                | 0              | 0.550249                | -1.007603 | -0.877256 |
| 12               | 6                | 0              | 1.788759                | 0.528265  | 0.000074  |
| 13               | 1                | 0              | 1.768013                | 1.187485  | 0.876457  |
| 14               | 1                | 0              | 1.767742                | 1.187931  | -0.875966 |
| 15               | 6                | 0              | 3.089854                | -0.279231 | -0.000336 |
| 16               | 1                | 0              | 3.155561                | -0.922431 | -0.883436 |
| 17               | 1                | 0              | 3.966023                | 0.374821  | -0.000309 |
| 18               | 1                | 0              | 3.155841                | -0.922880 | 0.882415  |

0 imaginary frequencies

#### Structure 1b

| Center<br>Number | Atomic<br>Number | Atomic<br>Type | Coordinates (Angstroms) |           |           |
|------------------|------------------|----------------|-------------------------|-----------|-----------|
|                  |                  |                | X                       | Y         | Z         |
| 1                | 6                | 0              | -3.038360               | 0.509055  | 0.000043  |
| 2                | 1                | 0              | -3.028164               | 1.168659  | -0.876121 |
| 3                | 1                | 0              | -3.028249               | 1.168415  | 0.876392  |
| 4                | 6                | 0              | -1.767365               | -0.348015 | -0.000015 |
| 5                | 1                | 0              | -1.777398               | -1.008398 | 0.876835  |
| 6                | 1                | 0              | -1.777317               | -1.008160 | -0.877047 |



|    |   |   |           |           |           |
|----|---|---|-----------|-----------|-----------|
| 7  | 6 | 0 | -4.325995 | -0.319617 | -0.000136 |
| 8  | 1 | 0 | -4.381534 | -0.964165 | 0.882708  |
| 9  | 1 | 0 | -5.212613 | 0.320137  | -0.000083 |
| 10 | 1 | 0 | -4.381453 | -0.963909 | -0.883172 |
| 11 | 6 | 0 | -0.473861 | 0.473900  | 0.000155  |
| 12 | 1 | 0 | -0.463404 | 1.134039  | 0.876883  |
| 13 | 1 | 0 | -0.463325 | 1.134273  | -0.876396 |
| 14 | 6 | 0 | 0.795381  | -0.384413 | 0.000099  |
| 15 | 1 | 0 | 0.786347  | -1.044308 | -0.876546 |
| 16 | 1 | 0 | 0.786275  | -1.044528 | 0.876578  |
| 17 | 6 | 0 | 2.084202  | 0.440551  | 0.000258  |
| 18 | 1 | 0 | 2.130692  | 1.101986  | 0.874046  |
| 19 | 1 | 0 | 2.130856  | 1.102242  | -0.873311 |
| 20 | 6 | 0 | 3.352640  | -0.393625 | 0.000319  |
| 21 | 8 | 0 | 4.465014  | 0.066887  | -0.000809 |
| 22 | 1 | 0 | 3.199335  | -1.498399 | 0.001363  |

---

0 imaginary frequencies

**Structure 1a**

| Center<br>Number | Atomic<br>Number | Atomic<br>Type | Coordinates (Angstroms) |           |           |
|------------------|------------------|----------------|-------------------------|-----------|-----------|
|                  |                  |                | X                       | Y         | Z         |
| 1                | 6                | 0              | 4.954435                | -0.615657 | -0.278717 |
| 2                | 1                | 0              | 5.031863                | -1.633951 | 0.121344  |
| 3                | 1                | 0              | 4.933309                | -0.719760 | -1.370282 |
| 4                | 6                | 0              | 6.190716                | 0.188948  | 0.132787  |
| 5                | 1                | 0              | 7.111696                | -0.284513 | -0.218368 |
| 6                | 1                | 0              | 6.159130                | 1.201594  | -0.281517 |
| 7                | 1                | 0              | 6.258736                | 0.280287  | 1.221451  |
| 8                | 6                | 0              | 3.637864                | 0.012157  | 0.192539  |
| 9                | 1                | 0              | 3.560615                | 1.031475  | -0.207852 |
| 10               | 1                | 0              | 3.659660                | 0.116921  | 1.285295  |
| 11               | 6                | 0              | 2.394531                | -0.785731 | -0.215070 |
| 12               | 1                | 0              | 2.468596                | -1.803293 | 0.189867  |
| 13               | 1                | 0              | 2.375758                | -0.894384 | -1.306922 |
| 14               | 6                | 0              | 1.079743                | -0.148355 | 0.248293  |

|    |   |   |           |           |           |
|----|---|---|-----------|-----------|-----------|
| 15 | 1 | 0 | 1.001093  | 0.863019  | -0.164402 |
| 16 | 1 | 0 | 1.099112  | -0.039951 | 1.340988  |
| 17 | 6 | 0 | -0.154449 | -0.951516 | -0.167589 |
| 18 | 1 | 0 | -0.115479 | -1.961535 | 0.252624  |
| 19 | 1 | 0 | -0.190935 | -1.056841 | -1.256611 |
| 20 | 6 | 0 | -1.471420 | -0.319423 | 0.261688  |
| 21 | 1 | 0 | -1.503849 | -0.168514 | 1.355032  |
| 22 | 8 | 0 | -2.488837 | -1.207961 | -0.120890 |
| 23 | 8 | 0 | -1.631516 | 0.941296  | -0.375376 |
| 24 | 6 | 0 | -3.806202 | -0.830522 | 0.266954  |
| 25 | 1 | 0 | -4.084283 | 0.109226  | -0.223791 |
| 26 | 1 | 0 | -3.840198 | -0.668366 | 1.355705  |
| 27 | 6 | 0 | -4.753902 | -1.944981 | -0.138072 |
| 28 | 1 | 0 | -5.781865 | -1.692175 | 0.135601  |
| 29 | 1 | 0 | -4.711589 | -2.104231 | -1.217772 |
| 30 | 1 | 0 | -4.481789 | -2.880263 | 0.356316  |
| 31 | 6 | 0 | -1.882384 | 2.059023  | 0.474952  |
| 32 | 1 | 0 | -2.754130 | 1.865506  | 1.115084  |
| 33 | 1 | 0 | -1.020929 | 2.235319  | 1.133812  |
| 34 | 6 | 0 | -2.128962 | 3.271044  | -0.404869 |
| 35 | 1 | 0 | -2.993968 | 3.106050  | -1.051202 |
| 36 | 1 | 0 | -2.315754 | 4.156843  | 0.208336  |
| 37 | 1 | 0 | -1.261788 | 3.464931  | -1.039988 |

---

0 imaginary frequencies

### Structure L11

| Center<br>Number | Atomic<br>Number | Atomic<br>Type | Coordinates (Angstroms) |           |           |
|------------------|------------------|----------------|-------------------------|-----------|-----------|
|                  |                  |                | X                       | Y         | Z         |
| 1                | 6                | 0              | -0.916216               | 0.390678  | -2.800630 |
| 2                | 6                | 0              | -0.473999               | 1.467756  | -3.522681 |
| 3                | 6                | 0              | 0.098308                | 2.592562  | -2.880880 |
| 4                | 6                | 0              | 0.209100                | 2.590434  | -1.453652 |
| 5                | 6                | 0              | -0.270547               | 1.468598  | -0.707950 |
| 6                | 6                | 0              | -0.814208               | 0.397499  | -1.390721 |
| 7                | 1                | 0              | 0.480244                | 3.697995  | -4.696039 |
| 8                | 1                | 0              | -1.331192               | -0.472080 | -3.306424 |
| 9                | 1                | 0              | -0.552536               | 1.461192  | -4.604393 |
| 10               | 6                | 0              | 0.571885                | 3.710512  | -3.614874 |

|    |    |   |           |           |           |
|----|----|---|-----------|-----------|-----------|
| 11 | 6  | 0 | 0.804337  | 3.718851  | -0.826638 |
| 12 | 6  | 0 | 1.255371  | 4.784487  | -1.568008 |
| 13 | 6  | 0 | 1.138110  | 4.785661  | -2.976371 |
| 14 | 1  | 0 | 0.900207  | 3.730978  | 0.251669  |
| 15 | 1  | 0 | 1.706381  | 5.634287  | -1.067838 |
| 16 | 1  | 0 | 1.497974  | 5.634064  | -3.547091 |
| 17 | 6  | 0 | 0.886099  | 0.778844  | 1.386861  |
| 18 | 6  | 0 | -0.166703 | 1.439309  | 0.782034  |
| 19 | 6  | 0 | -1.130907 | 2.097471  | 1.608183  |
| 20 | 6  | 0 | -0.985476 | 2.063676  | 3.033127  |
| 21 | 6  | 0 | 0.123794  | 1.383394  | 3.593050  |
| 22 | 6  | 0 | 1.045167  | 0.760447  | 2.792005  |
| 23 | 1  | 0 | -2.377938 | 2.813674  | -0.010027 |
| 24 | 6  | 0 | -2.250045 | 2.785722  | 1.064499  |
| 25 | 6  | 0 | -1.948060 | 2.716021  | 3.846561  |
| 26 | 1  | 0 | 0.245716  | 1.370597  | 4.670708  |
| 27 | 1  | 0 | 1.905289  | 0.264015  | 3.225075  |
| 28 | 6  | 0 | -3.014790 | 3.374358  | 3.287183  |
| 29 | 6  | 0 | -3.164436 | 3.405361  | 1.881961  |
| 30 | 1  | 0 | -1.824025 | 2.684215  | 4.924039  |
| 31 | 1  | 0 | -3.743982 | 3.869514  | 3.918166  |
| 32 | 1  | 0 | -4.011171 | 3.922472  | 1.444861  |
| 33 | 8  | 0 | -1.224135 | -0.680730 | -0.626332 |
| 34 | 8  | 0 | 1.819699  | 0.180827  | 0.563000  |
| 35 | 15 | 0 | -2.147382 | -1.956655 | -1.181415 |
| 36 | 15 | 0 | 2.577497  | -1.264577 | 0.943828  |
| 37 | 6  | 0 | -4.153082 | -0.540686 | 0.264573  |
| 38 | 6  | 0 | -5.503873 | -0.358613 | 0.143633  |
| 39 | 6  | 0 | -5.934874 | -1.051745 | -1.029622 |
| 40 | 6  | 0 | -4.830754 | -1.631268 | -1.589690 |

|    |   |   |           |           |           |
|----|---|---|-----------|-----------|-----------|
| 41 | 7 | 0 | -3.721737 | -1.324192 | -0.800414 |
| 42 | 1 | 0 | -3.455737 | -0.166939 | 0.993967  |
| 43 | 1 | 0 | -6.120714 | 0.217012  | 0.816740  |
| 44 | 1 | 0 | -6.940670 | -1.106780 | -1.416356 |
| 45 | 1 | 0 | -4.720557 | -2.234652 | -2.476336 |
| 46 | 6 | 0 | -1.692207 | -4.360063 | 0.022804  |
| 47 | 6 | 0 | -1.394604 | -4.906537 | 1.241504  |
| 48 | 6 | 0 | -1.271123 | -3.829695 | 2.172389  |
| 49 | 6 | 0 | -1.501272 | -2.662354 | 1.494566  |
| 50 | 7 | 0 | -1.760400 | -2.975966 | 0.165249  |
| 51 | 1 | 0 | -1.860227 | -4.821481 | -0.936925 |
| 52 | 1 | 0 | -1.274093 | -5.958636 | 1.448096  |
| 53 | 1 | 0 | -1.033077 | -3.907683 | 3.222193  |
| 54 | 1 | 0 | -1.475428 | -1.637948 | 1.822317  |
| 55 | 6 | 0 | 3.183608  | -1.574126 | -1.814675 |
| 56 | 6 | 0 | 2.809424  | -2.439523 | -2.804798 |
| 57 | 6 | 0 | 1.940571  | -3.417117 | -2.225347 |
| 58 | 6 | 0 | 1.814013  | -3.118502 | -0.897303 |
| 59 | 7 | 0 | 2.580500  | -1.982397 | -0.628663 |
| 60 | 1 | 0 | 3.832963  | -0.715733 | -1.834808 |
| 61 | 1 | 0 | 3.129656  | -2.389803 | -3.834376 |
| 62 | 1 | 0 | 1.478036  | -4.251754 | -2.729120 |
| 63 | 1 | 0 | 1.254501  | -3.603409 | -0.112839 |
| 64 | 6 | 0 | 6.033675  | 0.626928  | 0.764417  |
| 65 | 6 | 0 | 6.383590  | -0.561197 | 1.474039  |
| 66 | 6 | 0 | 5.241468  | -1.301604 | 1.620128  |
| 67 | 1 | 0 | 6.694700  | 1.436439  | 0.494767  |
| 68 | 1 | 0 | 7.360689  | -0.831037 | 1.843749  |
| 69 | 1 | 0 | 5.075421  | -2.256158 | 2.093680  |
| 70 | 7 | 0 | 4.191689  | -0.615130 | 1.019011  |

---

|    |   |   |          |          |          |
|----|---|---|----------|----------|----------|
| 71 | 6 | 0 | 4.691668 | 0.572591 | 0.494153 |
| 72 | 1 | 0 | 4.034884 | 1.270370 | 0.003753 |

---

0 imaginary frequencies

References:

- [1] Q. Zhang, K. Tiefenbacher, *J. Am. Chem. Soc.* 2013, **135**, 43, 16213–16219.
- [2] D. Wang, R. Cao, G. Lu, J. Ren, B. Zeng, *Tetrahedron*. 2021, **92**, 132250.
- [3] R. Ugarteá, T. Hudnall, *Green Chem.*, 2017, **19**, 1990-1998
- [4] E. Fernández, S. Castillan, *Tetrahedron Lett.*, 1994, **35**, 2361.
- [5] M. J. Frisch, G. W. Trucks, H. B. Schlegel, G. E. Scuseria, M. A. Robb, J. R. Cheeseman, G. Scalmani, V. Barone, G. A. Petersson, H. Nakatsuji, X. Li, M. Caricato, A. V. Marenich, J. Bloino, B. G. Janesko, R. Gomperts, B. Mennucci, H. P. Hratchian, J. V. Ortiz, A. F. Izmaylov, J. L. Sonnenberg, D. Williams-Young, F. Ding, F. Lipparini, F. Egidi, J. Goings, B. Peng, A. Petrone, T. Henderson, D. Ranasinghe, V. G. Zakrzewski, J. Gao, N. Rega, G. Zheng, W. Liang, M. Hada, M. Ehara, K. Toyota, R. Fukuda, J. Hasegawa, M. Ishida, T. Nakajima, Y. Honda, O. Kitao, H. Nakai, T. Vreven, K. Throssell, J. A. Montgomery, Jr., J. E. Peralta, F. Ogliaro, M. J. Bearpark, J. J. Heyd, E. N. Brothers, K. N. Kudin, V. N. Staroverov, T. A. Keith, R. Kobayashi, J. Normand, K. Raghavachari, A. P. Rendell, J. C. Burant, S. S. Iyengar, J. Tomasi, M. Cossi, J. M. Millam, M. Klene, C. Adamo, R. Cammi, J. W. Ochterski, R. L. Martin, K. Morokuma, O. Farkas, J. B. Foresman and D. J. Fox, Gaussian 16 A.03, Wallingford, CT, 2016.
